# Supplementary material for: Arabidopsis 14-3-3 epsilon members contribute to polarity of PIN auxin carrier and auxin transport-related development
Source: eLife. 2017 Apr 19;6:e24336. doi: 10.7554/eLife.24336 (PMC5397284; doi:10.7554/eLife.24336)
Supplement: Figure 1—source data 1. — Normalized data for the expression of 14-3-3 isoforms (absolute signal intensities) were obtained from the eFP Browser of the Bio-Analytic Resource for Plant Biology (BAR) (http://bar.utoronto.ca) (microarray data: A. thaliana, M. truncatula, P. trichocarpa, O. sativa, P. patens) or the Tomato Functional Genomics Database (http://ted.bti.cornell.edu/cgi-bin/TFGD/digital/home.cgi) (RNA-seq data: S. lycopersicum). Expression of ubiquitin is depicted for comparison. Individual Excel sheets have been created for the different plant species. Each Excel sheet lists detailed information of 14-3-3s, such as gene ID and phylogenetic subgroup as well as the origin of expression data including references. DOI: http://dx.doi.org/10.7554/eLife.24336.003 [file elife-24336-fig1-data1.xlsx]

## Sheet: A. thaliana
|8/5|	non-epsilon							epsilon							Data from Gene Expression Map of Arabidopsis Development: Schmid et al., 2005, Nat. Gen. 37:501, and the Nambara lab for the imbibed and dry seed stages. Data are normalized by the GCOS method, TGT values of 100. Most tissues were sampled in triplicate.
name	chi/phi	omega	psi	upsilon	lambda	nu	kappa	mu	epsilon	omicron	iota	pi			http://bar.utoronto.ca/efp/cgi-bin/efpWeb.cgi
locus	AT4G09000/AT1G35160	AT1G78300	AT5G38480	AT5G16050	AT5G10450	AT3G02520	AT5G65430	AT2G42590	AT1G22300	AT1G34760	AT1G26480	AT1G78220	AT4G05320
Tissue	AtGRF01/04	AtGRF02	AtGRF03	AtGRF05	AtGRF06	AtGRF07	AtGRF08	AtGRF09	AtGRF10	AtGRF11	AtGRF12	AtGRF13	UBQ10
rt.	2505.29	579.58	984.66	947.5	1663.9	520.16	1054.33	430.96	1662.81	25.95	2.4	6.15	2148.25		rt.		Root
hyp.	2003.73	452.23	797.68	651.16	1322.66	431.75	729.81	707.48	1223.89	16.84	1.43	4.84	1955.13		hyp.		Hypocotyl
cot.	2172.11	357.8	793.78	384.25	1487.7	383.25	862.96	1134.6	810.13	70.78	0.69	8.65	2511.45		cot.		Cotyledon
sho.apx.,veg.	2362.25	749.08	1098.03	878.33	1247.1	746	788.01	590.15	1201.45	1.96	0.45	6.1	1971.21		sho.apx.,veg.		Shoot Apex, Vegetative
lea.1+2	2472.25	485.08	1036.06	368.23	1528.41	386.26	904.05	1055.78	732.71	32.31	1.65	8.48	2656.05		lea.1+2		Leaf 1 + 2
veg.ros.	1816.93	524.23	820.21	488.11	1370.25	487.03	566.86	791.95	834.46	27.55	1.58	3.18	2167.98		veg.ros.		Vegetative Rosette
snc.lea.	1794.26	244.45	490.95	1037.06	1412.85	677.74	972.13	706.43	1127.11	42.38	0.51	3.86	2587.4		snc.lea.		Senescing Leaf
flo.stg.12	1979.59	593.68	787.16	737.36	999.71	465.11	521.75	520.23	1025.6	10.83	155.6	4.03	1809.3		flo.stg.12		Flower Stage 12
flo.stg.12,sta.	2944.23	954.45	982.31	799.4	640.44	526.21	308.75	365.93	1176.06	15.44	1251.78	5.36	2452.89		flo.stg.12,sta.		Flower Stage 12, Stamens
sd.stg.7 w/o sil.	1931.45	504.51	417.28	637.38	1043.74	333.08	1087.68	595.33	899.71	15.73	0.93	10.95	3239.55		sd.stg.7 w/o sil.		Seeds Stage 7 w/o Siliques
dry sd.	1190.79	26.11	668.07	836.65	1025.08	435.25	1595.19	211.12	636.35	98.53	1.18	6.88	2783.99		dry sd.		Dry Seed
												non-epsilon
												epsilon
												AtGRF9/10/12
												epsilon
												AtGRF11/13

## Sheet: S. lycopersicum
|7/3(5)|	non-epsilon							epsilon					Data from the Tomato Functional Genomics Database
locus	Solyc11g010470.1.1	Solyc12g057110.2.1	Solyc04g074510.2.1	Solyc02g063070.2.1	Solyc04g012120.2.1	Solyc11g010200.1.1	Solyc04g076060.2.1	Solyc04g074230.2.1	Solyc12g010860.1.1	Solyc07g053260.2.1	Solyc11g005670		http://ted.bti.cornell.edu/cgi-bin/TFGD/digital/data.cgi?ID=D006
Tissue	TFT01	TFT02	TFT03	TFT04	TFT05	TFT06	TFT10	TFT07	TFT08	TFT09	Ubiquitin
rt.	477.905	102.96	99.09	244.62	262.137	401.463	98.2275	146.91	43.0825	533.275	778.225		rt.		Root
hyp.	342.432	217.493	160.83	230.54	297.4	983.352	52.9625	184.608	41.3125	507.337	465.433		hyp.		Hypocotyl
cot.	384.827	183.963	127.327	181.123	320.083	329.363	30.87	125.06	30.1767	393.003	594.347		cot.		Cotyledon
mer.	243.553	166.947	146.023	211.067	246.475	925.18	50.4375	143.903	35.13	447.338	468.84		mer.		Vegetative Meristem
yng.lea.	162.38	258.11	126.587	236.38	309.463	1140.02	45.7833	139.86	48.0867	405.43	180.3		yng.lea.		Young Leaf
mat.lea.	454.273	187.685	77.8525	124.128	200.06	144.95	7.735	97.26	24.6825	326.655	213.613		mat.lea.		Mature Leaf
yfb.	159.68	172.295	96.765	196.13	246.405	1208.66	51.4075	157.5	36.5775	402.777	260.445		yfb.		Young Flovwer Bud
10dpa.	230.697	358.583	185.248	170.157	329.42	574.087	62.9475	164.477	38.965	453.648	320.925		10dpa.		Fruit At 10dpa [days past anthesis]
	epsilon	epsilon
locus	-	-
	TFT11	TFT12
	expression data not available	expression data not available
												non-epsilon
												epsilon

## Sheet: M. truncatula
|4/3(4)|	non-epsilon				epsilon					Data from A gene expression atlas of the model legume Medicago truncatula: Udvardi et al. (2008), The Plant Journal 55, 504-513. Data normalized by MAS 5.0 and RMA methods. TGT value of 100. All tissues sampled in triplicate.
locus	Medtr3g014060	Medtr3g099380	Medtr3g100620	Medtr5g064580	Medtr2g076960	Medtr5g044160	Medtr8g086270	Medtr8g018230.1		http://bar.utoronto.ca/efpmedicago/cgi-bin/efpWeb.cgi
Tissue	Medtr3g014060	Medtr3g099380	Medtr3g100620	Medtr5g064580	Medtr2g076960	Medtr5g044160	Medtr8g086270	UBQ3
rt.	17.65	16567.1	7426.49	18753.1	3809.89	2154.87	2367.24	12045.2		rt.		Root
non-ino.rt.	14.63	18168.5	8877.99	23209.7	7452.84	2342.26	3300.73	14609.9		non-ino.rt.		Non-inoculated Root
ndl.14d	7.97	20148.4	8458.12	27585.8	4556.67	1105.89	1165.33	17849.4		ndl.14d		Nodule 14d
lea.w pet.	27.07	13170.1	21417.2	24862.9	2014.5	589.47	602.98	14836		lea.w pet.		Leaf With Petiolules
pet.	34.21	15876	17511.4	22323.4	4483.65	1388.8	769.31	12116.6		pet.		Petiole
stm.	31.89	20242.2	13139.8	20237.3	5934.63	2486.57	723.49	10054.4		stm.		Stem
veg.bud	7.96	18304.6	9798.67	19396.8	4403.74	3084.81	1014.8	9863.88		veg.bud		Vegetative Bud
flo.	28.65	17553.2	13078.2	22308.4	5298.02	1219.4	726.57	11607.4		flo.		Flower
pod	13.52	24923.7	7668.02	23006.5	7157.06	2887.93	862.35	9222.41		pod		Pod
sd.20d	14.67	16573.4	5926.81	19369.8	5912.96	653.34	920.38	14787.9		sd.20d		Seed 20d
	epsilon
locus	Medtr4g083060
	Medtr4g083060
	expression data not available
												non-epsilon
												epsilon

## Sheet: P. trichocarpa
|6(7)/6(7)|	non-epsilon						epsilon							Wilkins et al., 2008. Plant Physiol. 149:981-993. Data from the Campbell Laboratory. Affymetrix expression data normalized by the GCOS method, with TGT value of 500. Duplicate or triplicate samples were analyzed from greenhouse-grown or field-grown material (in the case of catkins). The seedlings were grown on moist filter paper. All material was grown under a diurnal cycle of 12h light/dark and …
locus	Potri.002G099800	Potri.005G162400	Potri.004G101700	Potri.017G113300	Potri.002G103800	Potri.005G157700	Potri.011G110900	Potri.002G097500/Potri.005G164500	Potri.008G095000	Potri.010G159300	Potri.001G125600	Potri.007G123300		http://bar.utoronto.ca/efppop/cgi-bin/efpWeb.cgi
Tissue	PtGRF1/2/4a	PtGRF1/2/4b	PtGRF3/5/7a	PtGRF3/5/7b	PtGRF6/8a	PtGRF6/8b	PtGRF9b	PtGRF11a/b	PtGRF12a	PtGRF12b	PtGRF13	UBQ4
rt.	10755.9	3896.53	29421.4	24239.4	18403.4	5351.1	9737.43	3298.26	613.83	563.76	6.3	20687.1		rt.		Root
drk.grw.sdl.,eti.	14070.8	4356.54	25742.7	22763.2	9087.1	5375.95	11990.3	5015.5	1817.35	998.15	1.4	15525.7		drk.grw.sdl.,eti.		Dark-grown Seedling, Etiolated
drk.grw.sdl.,eti.,exp.3hr.lgt.	9661.65	3601.55	21909.1	19260.3	10832.2	4570	9799	4530.95	748.75	709.9	19.64	14387.6		drk.grw.sdl.,eti.,exp.3hr.lgt.		Dark-grown Seedling, Etiolated, Exposed To Light For 3hr
cnt.lgt.grw.sdl.	8096.2	2879.53	25453.5	19144.9	9167.56	4715.09	11898.6	5232.33	431.03	389.53	13.16	13427.1		cnt.lgt.grw.sdl.		Continuous Light-grown Seedling
yng.lea.	13527.2	3905.83	42335.7	27944.1	8410.69	2222.5	8640.73	10572.9	751.16	745.86	16.16	20471.6		yng.lea.		Young Leaf
mat.lea.	1628.54	922.04	6052.55	4146.24	838.25	415.37	2236.67	502.81	40.73	87.15	1.14	4512.3		mat.lea.		Mature Leaf
fem.cat.	24454.1	10015	41316.3	40145.6	6429.4	477.5	12371.8	5627.5	11449.7	23027	95.76	6494.56		fem.cat.		Female Catkins
mal.cat.	37402.6	13719.3	55293.5	34738	2396.46	539.33	10826.5	5409.16	17199.3	32455.4	67.66	10425.4		mal.cat.		Male Catkins
	non-epsilon	epsilon
locus	Potri.T147900	Potri.001G392200
	PtGRF3/5/7c	PtGRF9a
	no expression data available	no expression data available
												non-epsilon
												epsilon

## Sheet: O. sativa
|6/2|	non-epsilon						epsilon				Genome-wide Analysis, Classification, Temporal, and Spatial Gene Expression during Panicle and Seed Development, and Regulation by Light and Abiotic Stress: Jain M, Nijhawan A, Arora R, Agarwal P et al. Plant Physiol 2007 Apr;143(4):1467-83. Data is derived from the same paper, and normalized by MAS 5.0 and RMA methods. TGT value of 100 was used and all tissues were sampled in triplicate.
locus	LOC_Os08g37490	LOC_Os04g38870	LOC_Os08g33370	LOC_Os11g34450	LOC_Os02g36974	LOC_Os03g50290	LOC_Os01g11110	LOC_Os11g39540	LOC_Os04g53620		http://bar.utoronto.ca/efprice/cgi-bin/efpWeb.cgi
Tissue	OsGF14A	OsGF14B	OsGF14C	OsGF14D	OsGF14E	OsGF14F	OsGF14G	OsGF14H	UBQ3
sdl.rt.	13091.8	15405.7	18814	5730.46	13788.2	25327.4	282.45	50.76	20515.4		sdl.rt.		Seedling Root
yng.lea.	8355.58	10639.2	9062.33	2548.76	6562.51	20991.3	550.43	7.86	24455.8		yng.lea.		Young Leaf
mat.lea.	11271	9991.91	10500.1	8001.32	5318.54	22534.3	323.02	27.06	24987.1		mat.lea.		Mature Leaf
SAM	13211.6	7531.66	15652.7	8936.58	8046.27	25486.2	923.46	106.82	15359.6		SAM		SAM
yng.inf.	16443.8	7935.93	10880.8	6882.33	3268.19	22038.1	735.68	65.72	21468.8		yng.inf.		Young Inflorescence
inf.P4	12553.8	11456.9	13064.8	6581.03	6908.1	20423.1	488.1	80.66	20697.4		inf.P4		Inflorescence P4
sd.S2	14102.5	9223.98	6741.68	5082.29	6732.13	17268.7	365.3	19.55	21568		sd.S2		Seed S2
												non-epsilon
												epsilon

## Sheet: P. patens
|6/5|	non-epsilon						epsilon							Ortiz-Ramirez et al., Molecular Plant, 2015 / Winter et al., 2007. The different tissue types were isolated from wildtype Physcomitrella patens (Gransden) grown in controlled conditions at 25 °C with 16h light and 50% humidity. Induction of gametangia and sporophyte development was conducted in short day conditions at 17 °C and 50% humidity. Tissues were sampled in triplicate and processed for hy…
locus	Pp1s137_194V6	Pp1s137_232V6	Pp1s140_61V6	Pp1s140_63V6	Pp1s73_133V6	Pp1s73_90V6	Pp1s201_25V6	Pp1s348_15V6	Pp1s348_9V6	Pp1s46_127V6	Pp1s67_176V6	Pp1s127_93V6.1		http://bar.utoronto.ca/efp_physcomitrella/cgi-bin/efpWeb.cgi
Tissue	Pp1s137_194V6	Pp1s137_232V6	Pp1s140_61V6	Pp1s140_63V6	Pp1s73_133V6	Pp1s73_90V6	Pp1s201_25V6	Pp1s348_15V6	Pp1s348_9V6	Pp1s46_127V6	Pp1s67_176V6	PpUbq1
chl.	16470.2	10047.5	265.57	3289.29	22652.4	21341.8	16054.7	21434.5	16437.1	19618.5	25158.7	19893.7		chl.		Chloronema
cau.	20689	20133.2	151.65	7338.28	23599.5	24885.6	18624.7	19741.4	15461.2	29136.9	23108.6	24963.3		cau.		Caulonema
rhz.	13601.7	10756.8	230.19	3820.49	12707.2	23251.8	17876.5	22131.5	14987.6	21662.3	25252.8	20931.4		rhz.		Rhizoids
gmp.	15513.4	9219.33	117.53	9807.09	14765.2	19731.9	14396.3	23490	19965.5	19363.2	24714.2	16371.5		gmp.		Gametophore
arc.	16900.1	13582.2	4574.43	13024.8	16446.4	21644.1	11113.1	24569	18914.6	26419.8	26383	18146		arc.		Archegonia
spp.S1	15870.8	13092.6	236.43	12935.8	12351.2	23824.8	10773.5	22373.7	11243.3	21820.7	26136	18655.6		spp.S1		Sporophyte S1
spp.S3	17323	10646.7	484.09	3812.73	14766	20786.4	12785.2	27485	22928.6	24316.9	25298.4	18345.9		spp.S3		Sporophyte S3
spp.M	17970.6	8563.77	159.47	2231.63	12550.3	21387.7	8944.95	21014.5	18583.4	21305.8	23275.8	11864.2		spp.M		Sporophyte M
spo.	16104.1	8740.04	256.2	700.28	20590.2	26680.6	6855.94	24808.3	18131.5	14277.3	22219.8	20640.8		spo.		Spores
												non-epsilon
												epsilon
