# Supplementary material for: Arabidopsis 14-3-3 epsilon members contribute to polarity of PIN auxin carrier and auxin transport-related development
Source: eLife. 2017 Apr 19;6:e24336. doi: 10.7554/eLife.24336 (PMC5397284; doi:10.7554/eLife.24336)
Supplement: Table 1—source data 1. — Proteins listed in Table 1 are shown in bold face while well characterized 14-3-3 clients are highlighted in green. DOI: http://dx.doi.org/10.7554/eLife.24336.019 [file elife-24336-table1-data1.xlsx]

## Sheet: FINAL
AGI code	gene name	description	Mol. weight [kDa]	peptides		Sequence coverage [%]		Intensities		TAIR10 Commentary
				R1	R2	R1	R2	R1	R2	FUNCTIONS IN	INVOLVED IN	LOCATED IN
AT1G22300	GRF10	14-3-3-like protein GF14 epsilon	28.9	33	34	76.8	76.8	125410000000	16578000000	39;496;497;537;584;585;713;1169;1366;1567;1568;1569;1704;1786;1795;2153;2154;2155;2266;2267;2295;2557;2558;2683;2749;3362;3380;3405;3406;3695;3696;3746;3747	True;True;True;True;True;True;True;True;True;True;True;True;True;True;True;True;True;True;True;True;True;True;True;True;True;True;True;True;True;True;True;True;True	39;497;498;538;588;589;717;1176;1375;1578;1579;1580;1715;1797;1806;2166;2167;2168;2169;2280;2281;2309;2310;2575;2576;2701;2767;3382;3400;3425;3426;3716;3717;3718;3719;3771;3772	56;57;58;59;60;61;62;63;711;712;713;714;715;716;717;718;719;779;780;781;782;783;784;857;858;859;860;861;862;863;864;865;866;1056;1846;1847;2156;2157;2158;2159;2160;2161;2162;2163;2164;2165;2166;2167;2168;2169;2170;2171;2172;2173;2174;2175;2176;2177;2476;2477;2478;2479;2480;2481;2482;2483;2484;2485;2486;2487;2488;2489;2490;2491;2492;2493;2494;2495;2496;2497;2498;2499;2500;2501;2502;2503;2504;2505;…	65;66;67;68;69;70;71;72;752;753;754;755;756;757;758;759;760;761;762;763;764;765;766;827;828;829;830;831;832;833;834;835;836;837;838;839;840;841;917;918;919;920;921;922;923;924;925;926;927;928;1128;2071;2072;2073;2074;2075;2076;2395;2396;2397;2398;2399;2400;2401;2402;2403;2404;2405;2406;2407;2408;2409;2410;2411;2412;2413;2414;2415;2416;2417;2418;2419;2420;2421;2422;2423;2744;2745;2746;2747;2748;27…	67;754;765;830;922;928;1128;2072;2401;2744;2761;2775;3017;3147;3163;3802;3804;3806;3958;3959;4000;4494;4497;4717;4806;5916;6002;6050;6051;6478;6489;6609;6617	163;437;438;439;440	1;24;28;125;222
AT1G35160	GRF4	14-3-3-like protein GF14 phi	30.194	30	29	86.1	83.1	42333000000	3983500000	22;25;391;503;504;505;537;581;582;630;646;1167;1168;1443;1478;1536;1695;1843;1844;2223;2294;2446;2447;2561;2562;2878;3337;3430;3708;3745	True;True;True;True;True;True;False;True;True;True;True;True;True;True;True;True;True;True;True;True;True;True;True;True;True;True;True;True;True;True	22;25;392;504;505;506;538;585;586;634;650;1174;1175;1452;1487;1546;1706;1854;1855;2237;2308;2463;2464;2579;2580;2897;3357;3450;3731;3732;3733;3770	30;35;36;564;565;566;567;568;569;734;735;736;737;738;779;780;781;782;783;784;851;852;853;854;931;932;958;959;960;1843;1844;1845;2288;2289;2336;2417;2418;2419;2420;2421;2697;2698;2699;2700;2701;2702;2952;2953;2954;2955;3535;3627;3628;3872;3873;3874;3875;3876;3877;4082;4083;4084;4085;4086;4087;4088;4089;4090;4606;4607;5305;5306;5307;5308;5309;5310;5311;5312;5313;5314;5315;5316;5474;5882;5883;5884;5…	30;35;36;596;597;598;599;600;601;602;603;604;782;783;784;785;786;827;828;829;830;831;832;833;834;835;836;837;838;839;840;841;911;912;913;914;997;998;1026;1027;1028;2068;2069;2070;2543;2544;2593;2682;2683;2684;2685;2686;2687;2688;2982;2983;2984;2985;2986;2987;2988;3251;3252;3253;3254;3255;3256;3257;3258;3259;3902;3996;3997;4274;4275;4276;4277;4278;4279;4280;4281;4282;4283;4284;4510;4511;4512;4513;…	30;35;597;782;783;786;830;912;913;998;1026;2069;2070;2544;2593;2684;2983;3251;3254;3902;3996;4274;4283;4513;4521;5078;5851;6082;6525;6599	424;425;426;427;436	30;34;133;230;244
AT4G09000	GRF1	14-3-3-like protein GF14 chi	29.931	29	27	86.9	86.9	39975000000	3644300000	26;301;302;321;391;423;500;501;502;537;587;644;1165;1480;1536;1695;1843;1844;2010;2294;2446;2447;2561;2562;2879;3345;3430;3708;3744	True;True;True;True;False;True;True;True;True;False;True;True;True;True;False;False;False;False;True;False;False;False;False;False;True;True;False;False;True	26;301;302;321;392;424;501;502;503;538;591;648;1172;1489;1546;1706;1854;1855;2023;2308;2463;2464;2579;2580;2898;3365;3450;3731;3732;3733;3769	37;38;439;440;441;465;466;467;468;469;470;471;472;473;474;475;564;565;566;567;568;569;615;616;617;618;725;726;727;728;729;730;731;732;733;779;780;781;782;783;784;870;871;872;873;952;953;954;1833;1834;1835;1836;1837;1838;1839;1840;1841;2338;2339;2417;2418;2419;2420;2421;2697;2698;2699;2700;2701;2702;2952;2953;2954;2955;3210;3211;3212;3213;3214;3215;3216;3217;3218;3219;3627;3628;3872;3873;3874;3875…	37;38;39;40;41;42;43;44;45;46;467;468;469;493;494;495;496;497;498;499;500;501;502;503;504;505;506;507;596;597;598;599;600;601;602;603;604;653;654;655;656;657;772;773;774;775;776;777;778;779;780;781;827;828;829;830;831;832;833;834;835;836;837;838;839;840;841;934;935;936;937;1020;1021;1022;2056;2057;2058;2059;2060;2061;2062;2063;2064;2065;2066;2595;2596;2597;2598;2682;2683;2684;2685;2686;2687;2688;…	39;467;468;506;597;657;774;777;781;830;935;1022;2061;2595;2684;2983;3251;3254;3562;3996;4274;4283;4513;4521;5082;5873;6082;6525;6598	422;423;424;425;426;427	16;29;33;132;229;243
AT1G78300	GRF2	14-3-3-like protein GF14 omega	29.161	26	24	84.6	82.6	26494000000	2069100000	269;390;498;499;537;583;631;645;1166;1481;1536;1694;1843;1844;1985;2294;2446;2447;2561;2562;2777;2880;3430;3583;3708;3745	True;True;True;True;False;True;True;True;True;True;False;True;False;False;True;False;False;False;False;False;True;True;False;True;False;False	269;391;499;500;538;587;635;649;1173;1490;1546;1705;1854;1855;1998;2308;2463;2464;2579;2580;2796;2899;3450;3603;3731;3732;3733;3770	386;562;563;720;721;722;723;724;779;780;781;782;783;784;855;856;933;934;955;956;957;1842;2340;2417;2418;2419;2420;2421;2691;2692;2693;2694;2695;2696;2952;2953;2954;2955;3176;3177;3627;3628;3872;3873;3874;3875;3876;3877;4082;4083;4084;4085;4086;4087;4088;4089;4090;4411;4412;4413;4613;4614;5474;5694;5695;5696;5882;5883;5884;5885;5886;5887;5888;5889;5890;5891;5892;5893;5894;5895;5896;5948;5949	412;594;595;767;768;769;770;771;827;828;829;830;831;832;833;834;835;836;837;838;839;840;841;915;916;999;1000;1001;1023;1024;1025;2067;2599;2682;2683;2684;2685;2686;2687;2688;2976;2977;2978;2979;2980;2981;3251;3252;3253;3254;3255;3256;3257;3258;3259;3517;3518;3996;3997;4274;4275;4276;4277;4278;4279;4280;4281;4282;4283;4284;4510;4511;4512;4513;4514;4515;4516;4517;4518;4519;4520;4521;4862;4863;4864;…	412;594;767;771;830;916;999;1025;2067;2599;2684;2977;3251;3254;3518;3996;4274;4283;4513;4521;4864;5088;6082;6320;6525;6599	424;425;426;427;499;500	11;24;28;127;224;238
AT5G38480	GRF3	14-3-3-like protein GF14 psi	28.606	26	28	77.3	85.5	26426000000	4608400000	507;508;537;586;609;641;642;1134;1170;1478;1535;1705;1843;1844;2294;2446;2447;2559;2560;2778;3030;3305;3346;3430;3708;3743	True;True;False;True;True;True;True;True;True;False;True;True;False;False;False;False;False;True;True;True;True;True;True;False;False;True	508;509;538;590;613;645;646;1141;1177;1487;1545;1716;1854;1855;2308;2463;2464;2577;2578;2797;3049;3325;3366;3450;3731;3732;3733;3768	740;741;742;779;780;781;782;783;784;867;868;869;899;944;945;946;947;948;1789;1790;1848;1849;1850;1851;2336;2413;2414;2415;2416;2733;2734;2735;2952;2953;2954;2955;3627;3628;3872;3873;3874;3875;3876;3877;4075;4076;4077;4078;4079;4080;4081;4414;4415;4416;4417;4418;4419;4420;4421;4835;5265;5266;5327;5474;5882;5883;5884;5885;5886;5887;5888;5889;5890;5891;5892;5893;5894;5895;5896;5945;5946	788;789;790;827;828;829;830;831;832;833;834;835;836;837;838;839;840;841;929;930;931;932;933;963;1012;1013;1014;1015;1016;2012;2013;2077;2078;2079;2080;2593;2675;2676;2677;2678;2679;2680;2681;3020;3021;3022;3023;3024;3251;3252;3253;3254;3255;3256;3257;3258;3259;3996;3997;4274;4275;4276;4277;4278;4279;4280;4281;4282;4283;4284;4501;4502;4503;4504;4505;4506;4507;4508;4509;4870;4871;4872;4873;4874;487…	788;789;830;930;963;1012;1015;2013;2078;2593;2677;3020;3251;3254;3996;4274;4283;4505;4509;4874;5325;5799;5874;6082;6525;6596	425;426;427;428;429;430	10;23;27;126;223;237
AT1G35580	CINV1	Alkaline/neutral invertase CINV1	62.834	33	30	67.9	54.4	15359000000	1480000000	322;333;413;433;797;922;948;1097;1209;1308;1449;1677;1820;1939;1961;2299;2493;2494;2527;2689;2711;2742;2771;2934;3017;3048;3124;3145;3204;3360;3509;3510;3657	True;True;False;False;True;True;True;True;True;True;True;False;False;False;False;True;True;True;True;True;False;False;True;True;True;True;False;False;False;False;True;True;True	322;333;414;434;801;928;954;1103;1104;1216;1316;1458;1688;1831;1951;1973;1974;2314;2511;2512;2545;2707;2729;2760;2789;2953;3036;3067;3144;3165;3224;3380;3529;3530;3678	476;488;489;601;629;630;1165;1166;1167;1168;1373;1374;1375;1376;1419;1420;1710;1711;1712;1909;1910;2055;2299;2300;2666;2922;2923;3113;3114;3144;3145;3146;3147;3635;3636;3637;3963;3964;3965;4026;4027;4279;4280;4307;4308;4351;4352;4393;4699;4700;4819;4860;4972;4973;4999;5000;5127;5351;5580;5581;5582;5583;5791;5792	508;520;521;639;668;669;1242;1243;1244;1245;1479;1480;1481;1482;1528;1529;1909;1910;1911;1912;1913;2139;2140;2289;2554;2555;2951;3221;3222;3448;3449;3450;3451;3485;3486;3487;3488;4004;4005;4006;4007;4008;4376;4377;4378;4444;4445;4446;4447;4724;4725;4752;4753;4796;4797;4838;5186;5187;5307;5308;5350;5351;5465;5466;5492;5493;5649;5650;5651;5898;6197;6198;6199;6200;6201;6202;6416;6417;6418	508;521;639;669;1243;1480;1528;1912;2140;2289;2555;2951;3221;3448;3487;4006;4377;4378;4445;4725;4752;4797;4838;5186;5307;5350;5466;5492;5650;5898;6197;6198;6417	131;134;541;549;802;803;804;805;806;807;808;809;810;811;812;813	18;45;84;85;96;137;171;289;314;347;359;375;416;519;529;538
AT3G02520	GRF7	14-3-3-like protein GF14 nu	29.824	24	27	81.5	84.9	11566000000	1801400000	493;537;586;608;640;643;1135;1164;1317;1444;1482;1536;1705;1843;1844;2294;2446;2447;2563;2776;3003;3304;3430;3708	True;False;False;True;True;True;True;True;True;True;True;False;False;False;False;False;False;False;True;True;True;True;False;False	494;538;590;612;644;647;1142;1171;1326;1453;1491;1546;1716;1854;1855;2308;2463;2464;2581;2795;3022;3324;3450;3731;3732;3733	706;707;779;780;781;782;783;784;867;868;869;897;898;943;949;950;951;1791;1792;1793;1831;1832;2067;2068;2290;2291;2341;2417;2418;2419;2420;2421;2733;2734;2735;2952;2953;2954;2955;3627;3628;3872;3873;3874;3875;3876;3877;4091;4092;4407;4408;4409;4410;4802;5262;5263;5264;5474;5882;5883;5884;5885;5886;5887;5888;5889;5890;5891;5892;5893;5894;5895;5896	746;747;827;828;829;830;831;832;833;834;835;836;837;838;839;840;841;929;930;931;932;933;961;962;1010;1011;1017;1018;1019;2014;2015;2016;2054;2055;2301;2302;2545;2546;2600;2682;2683;2684;2685;2686;2687;2688;3020;3021;3022;3023;3024;3251;3252;3253;3254;3255;3256;3257;3258;3259;3996;3997;4274;4275;4276;4277;4278;4279;4280;4281;4282;4283;4284;4522;4523;4524;4853;4854;4855;4856;4857;4858;4859;4860;486…	747;830;930;961;1011;1018;2015;2054;2302;2546;2600;2684;3020;3251;3254;3996;4274;4283;4523;4856;5290;5798;6082;6525	162;425;426;427	24;28;127;224
AT4G09510	CINV2	Alkaline/neutral invertase CINV2	64.232	35	25	68.1	44.6	9882600000	295430000	127;363;364;413;433;947;1098;1207;1448;1677;1791;1820;1939;1961;2260;2312;2313;2497;2498;2574;2686;2711;2742;2935;3018;3060;3113;3124;3145;3204;3360;3414;3511;3661;3742	True;True;True;True;True;True;True;True;True;True;True;True;True;True;True;True;True;True;True;True;True;True;True;True;True;True;True;True;True;True;True;True;True;True;True	127;363;364;414;434;953;1105;1214;1457;1688;1802;1831;1951;1973;1974;2274;2327;2328;2515;2516;2592;2704;2729;2760;2954;3037;3079;3133;3144;3165;3224;3380;3434;3531;3682;3767	204;524;525;526;527;528;529;601;629;630;1418;1713;1905;1906;1907;2297;2298;2666;2863;2864;2922;2923;3113;3114;3144;3145;3146;3147;3584;3585;3654;3655;3656;3969;3970;3971;4111;4112;4276;4307;4308;4351;4352;4701;4820;4874;4953;4954;4972;4973;4999;5000;5127;5351;5455;5456;5584;5797;5943;5944	224;556;557;558;559;560;561;639;668;669;1527;1914;2135;2136;2137;2552;2553;2951;3155;3156;3221;3222;3448;3449;3450;3451;3485;3486;3487;3488;3951;3952;4025;4026;4027;4382;4383;4384;4543;4544;4721;4752;4753;4796;4797;5188;5309;5310;5365;5446;5447;5465;5466;5492;5493;5649;5650;5651;5898;6061;6062;6063;6203;6423;6594;6595	224;556;558;639;669;1527;1914;2135;2553;2951;3155;3221;3448;3487;3952;4025;4027;4382;4384;4544;4721;4752;4797;5188;5310;5365;5446;5466;5492;5650;5898;6063;6203;6423;6594	131;134;538;539;540;541;542;543;544;545;546;547;548;549;550;551;552	1;23;67;76;92;104;145;179;297;322;355;367;424;527;528;537;546
AT5G16050	GRF5	14-3-3-like protein GF14 upsilon	30.182	24	26	78.7	73.5	8229700000	907080000	494;495;537;586;624;640;830;1135;1177;1445;1482;1705;1843;1844;2294;2446;2447;2563;2776;2981;3308;3388;3430;3708	True;True;False;False;True;False;True;False;True;True;False;False;False;False;False;False;False;False;False;True;True;True;False;False	495;496;538;590;628;644;834;1142;1184;1454;1491;1716;1854;1855;2308;2463;2464;2581;2795;3000;3328;3408;3450;3731;3732;3733	708;709;710;779;780;781;782;783;784;867;868;869;924;943;1215;1791;1792;1793;1860;2292;2293;2341;2733;2734;2735;2952;2953;2954;2955;3627;3628;3872;3873;3874;3875;3876;3877;4091;4092;4407;4408;4409;4410;4772;4773;5269;5270;5271;5272;5421;5422;5474;5882;5883;5884;5885;5886;5887;5888;5889;5890;5891;5892;5893;5894;5895;5896	748;749;750;751;827;828;829;830;831;832;833;834;835;836;837;838;839;840;841;929;930;931;932;933;990;1010;1011;1293;1294;1295;2014;2015;2016;2089;2547;2548;2600;3020;3021;3022;3023;3024;3251;3252;3253;3254;3255;3256;3257;3258;3259;3996;3997;4274;4275;4276;4277;4278;4279;4280;4281;4282;4283;4284;4522;4523;4524;4853;4854;4855;4856;4857;4858;4859;4860;4861;5260;5261;5806;5807;5808;5809;5810;5811;5812…	748;751;830;930;990;1011;1293;2015;2089;2548;2600;3020;3251;3254;3996;4274;4283;4523;4856;5260;5807;6024;6082;6525	162;425;426;427	26;30;129;226
AT5G10450	GRF6	14-3-3-like protein GF14 lambda	27.975	20	16	79.4	52.8	6985100000	447580000	24;506;521;537;1675;1676;1758;1790;1843;2008;2294;2382;2446;2513;2565;2881;3075;3419;3430;3711	True;True;True;False;True;True;True;True;False;True;False;True;False;True;True;True;True;True;False;True	24;507;522;538;1686;1687;1769;1801;1854;2021;2308;2397;2463;2531;2583;2900;3094;3095;3439;3450;3736	32;33;34;739;759;779;780;781;782;783;784;2663;2664;2665;2809;2810;2861;2862;2952;3206;3207;3627;3628;3762;3763;3872;3873;3874;3875;3993;4094;4095;4615;4616;4617;4618;4891;4892;4893;4894;5461;5474;5900;5901	32;33;34;787;807;827;828;829;830;831;832;833;834;835;836;837;838;839;840;841;2948;2949;2950;3100;3101;3153;3154;3251;3554;3555;3556;3557;3996;3997;4151;4152;4274;4275;4276;4277;4278;4279;4280;4281;4282;4406;4526;4527;5090;5091;5092;5093;5094;5382;5383;5384;5385;6069;6082;6550;6551;6552	33;787;807;830;2948;2950;3101;3153;3251;3557;3996;4151;4274;4406;4527;5094;5382;6069;6082;6550	162;427;441;442;443;446;447;448;449	13;26;30;130;155;169;227;241;245
AT2G18960	AHA1	ATPase 1, plasma membrane-type	104.22	42	39	39.4	33.8	4201600000	353990000	14;49;51;189;354;519;605;626;667;825;826;1026;1027;1102;1260;1309;1310;1360;1361;1390;1594;1667;1668;1685;1728;1729;1935;2014;2015;2140;2177;2290;2342;2454;2725;2842;3148;3193;3395;3416;3485;3677	True;True;True;True;True;True;True;True;True;True;True;True;True;True;True;True;True;True;True;True;True;True;True;True;True;True;True;True;True;True;True;True;True;True;True;True;True;True;True;True;True;True	14;49;51;189;354;520;609;630;671;829;830;1032;1033;1109;1268;1317;1318;1369;1370;1399;1605;1678;1679;1696;1739;1740;1947;2027;2028;2153;2191;2304;2357;2471;2743;2861;3168;3213;3415;3436;3505;3698	20;21;22;74;76;285;515;756;894;926;982;983;1209;1210;1211;1595;1596;1597;1717;1986;1987;2056;2057;2145;2146;2147;2148;2219;2220;2544;2654;2655;2656;2679;2680;2769;2770;3108;3223;3224;3406;3407;3477;3622;3705;3885;3886;4329;4535;5004;5100;5430;5458;5551;5552;5823	20;21;22;83;85;308;547;804;958;992;1050;1051;1287;1288;1289;1783;1784;1785;1918;2220;2221;2290;2291;2384;2385;2386;2387;2474;2475;2819;2820;2821;2939;2940;2941;2964;2965;3060;3061;3443;3576;3577;3769;3770;3841;3990;3991;4092;4292;4293;4774;4996;5497;5611;6036;6065;6066;6161;6162;6452	21;83;85;308;547;804;958;992;1051;1287;1289;1783;1784;1918;2220;2290;2291;2384;2386;2474;2820;2939;2941;2964;3060;3061;3443;3576;3577;3769;3841;3991;4092;4293;4774;4996;5497;5611;6036;6066;6162;6452	120;121;122;123;359;360;363;364	314;320;323;364;378;381;509;585
AT1G68060	MAP70-1	Microtubule-associated protein 70-1	69.289	28	11	37.5	18.2	2936000000	14217000	19;20;42;277;436;455;458;518;707;725;744;939;960;1186;1253;1692;1709;2193;2499;2549;2602;2658;2695;2871;2997;3307;3373;3500	True;True;True;True;True;True;True;True;True;True;True;True;True;True;True;True;True;True;True;True;True;True;True;True;True;True;True;True	19;20;42;277;437;456;459;519;711;729;748;945;966;1193;1261;1703;1720;2207;2517;2567;2620;2676;2713;2890;3016;3327;3393;3520	27;28;66;405;406;633;660;661;664;665;755;1048;1071;1072;1098;1410;1437;1871;1977;2688;2689;2740;3496;3972;4056;4153;4228;4286;4587;4588;4792;4793;5268;5387;5571	27;28;75;432;433;672;700;701;704;705;803;1120;1143;1144;1171;1172;1519;1547;2100;2210;2973;2974;3031;3861;4385;4476;4591;4670;4731;5056;5057;5280;5281;5805;5987;5988;6188	27;28;75;432;672;701;705;803;1120;1143;1171;1519;1547;2100;2210;2973;3031;3861;4385;4476;4591;4670;4731;5056;5281;5805;5988;6188	172;173;592;593;594;714	146;238;296;333;349;548
AT1G37130	NIA2	Nitrate reductase 2	102.84	42	18	51.1	21.8	2307900000	37808000	123;159;356;429;446;635;650;678;839;857;956;993;1045;1063;1071;1189;1223;1350;1386;1389;1526;1683;1714;1757;1787;1918;2067;2330;2363;2364;2437;2690;2759;2760;2936;3064;3119;3120;3278;3422;3564;3648	True;True;True;True;True;True;True;True;True;True;True;True;True;True;True;True;True;True;True;True;True;True;True;True;True;True;True;True;True;True;True;True;True;True;True;True;True;True;True;True;True;True	123;159;356;430;447;639;654;682;843;862;962;999;1051;1069;1077;1196;1231;1359;1395;1398;1536;1694;1725;1768;1798;1929;2080;2345;2378;2379;2454;2708;2777;2778;2955;3083;3139;3140;3298;3442;3584;3669	198;199;200;247;517;624;650;938;964;997;1226;1248;1433;1556;1618;1642;1653;1876;1877;1932;1933;2130;2131;2213;2217;2218;2400;2676;2677;2745;2746;2808;2857;3068;3299;3300;3676;3740;3741;3859;4281;4380;4381;4702;4878;4962;4963;5225;5226;5464;5465;5659;5780	218;219;220;267;549;663;690;1005;1032;1065;1306;1328;1543;1744;1807;1831;1844;2105;2106;2163;2164;2369;2370;2468;2472;2473;2660;2961;2962;3036;3037;3099;3149;3378;3654;3655;4047;4129;4130;4255;4726;4825;4826;5189;5369;5455;5456;5755;5756;6072;6073;6280;6405	218;267;549;663;690;1005;1032;1065;1306;1328;1543;1744;1807;1831;1844;2105;2164;2369;2468;2473;2660;2961;3037;3099;3149;3378;3655;4047;4129;4130;4255;4726;4825;4826;5189;5369;5455;5456;5756;6072;6280;6405	322;323;324;325;326;327;328;329;330;331;332;333	130;173;273;284;513;544;547;607;689;747;872;906
AT4G34860	A/N-INVB	Alkaline/neutral invertase B	65.036	29	22	48.7	36.4	1925100000	156520000	132;229;362;433;442;762;963;1205;1206;1306;1677;1765;1962;2023;2093;2314;2413;2545;2622;2687;2712;2916;3019;3124;3145;3360;3425;3661;3742	True;True;True;False;True;True;True;True;True;True;False;True;True;True;True;True;True;True;True;True;True;True;True;False;False;False;True;False;False	132;229;362;434;443;766;969;1212;1213;1314;1688;1776;1975;2036;2106;2329;2430;2563;2640;2705;2730;2935;3038;3144;3165;3380;3445;3682;3767	212;334;335;523;629;630;642;643;1121;1441;1903;1904;2052;2053;2666;2827;3148;3149;3150;3243;3342;3657;3810;3811;4052;4186;4277;4309;4310;4671;4821;4822;4972;4973;4999;5000;5351;5468;5797;5943;5944	232;358;359;555;668;669;681;682;1197;1551;1552;2133;2134;2286;2287;2951;3118;3489;3490;3491;3597;3703;4028;4200;4201;4202;4472;4628;4722;4754;4755;5157;5311;5312;5465;5466;5492;5493;5898;6076;6423;6594;6595	232;359;555;669;681;1197;1552;2133;2134;2287;2951;3118;3489;3597;3703;4028;4201;4472;4628;4722;4755;5157;5311;5466;5492;5898;6076;6423;6594	131;552;903;904;905;906;907;908;909	158;192;249;320;335;437;540;541;550
AT1G34760	GRF11	14-3-3-like protein GF14 omicron	27.514	7	6	19.1	19.1	1885100000	6300000	537;1567;1568;2448;2449;3695;3696	False;False;False;True;True;False;False	538;1578;1579;2465;2466;3716;3717;3718;3719	779;780;781;782;783;784;2476;2477;2478;2479;2480;2481;2482;2483;2484;2485;2486;2487;2488;2489;2490;2491;2492;2493;2494;2495;2496;2497;2498;2499;3878;3879;5846;5847;5848;5849;5850;5851;5852;5853;5854;5855	827;828;829;830;831;832;833;834;835;836;837;838;839;840;841;2744;2745;2746;2747;2748;2749;2750;2751;2752;2753;2754;2755;2756;2757;2758;2759;2760;2761;2762;2763;2764;2765;2766;2767;2768;2769;2770;2771;2772;4285;4286;6477;6478;6479;6480;6481;6482;6483;6484;6485;6486;6487;6488;6489;6490	830;2744;2761;4285;4286;6478;6489	162;863;864	24;28;222
AT5G03280	EIN2	Ethylene-insensitive protein 2	140.95	37	17	33.7	16.7	1676900000	65484000	23;238;388;410;451;559;560;711;781;914;919;1132;1239;1739;1900;1910;2119;2169;2259;2324;2389;2400;2457;2724;2727;2852;2911;2940;2966;3071;3072;3147;3247;3682;3794;3795;3805	True;True;True;True;True;True;True;True;True;True;True;True;True;True;True;True;True;True;True;True;True;True;True;True;True;True;True;True;True;True;True;True;True;True;True;True;True	23;238;389;411;452;562;563;715;785;920;925;1139;1247;1750;1911;1921;2132;2183;2273;2339;2404;2415;2474;2742;2745;2871;2930;2959;2985;3090;3091;3167;3267;3703;3819;3820;3830	31;346;560;594;656;820;821;1053;1144;1145;1364;1369;1786;1787;1959;2785;3043;3058;3371;3468;3469;3583;3669;3771;3784;3889;4327;4328;4331;4552;4666;4709;4738;4887;4888;5003;5185;5831;6015;6016;6028	31;370;592;632;696;878;879;1125;1220;1221;1470;1475;2009;2010;2192;3076;3352;3367;3368;3734;3832;3833;3950;4040;4160;4173;4296;4772;4773;4776;5013;5152;5196;5226;5378;5379;5496;5711;6462;6672;6673;6685	31;370;592;632;696;878;879;1125;1221;1470;1475;2009;2192;3076;3352;3368;3734;3832;3950;4040;4160;4173;4296;4772;4776;5013;5152;5196;5226;5378;5379;5496;5711;6462;6672;6673;6685	855;856;857;858;859;860;861;862	1;730;777;779;825;938;1233;1276
AT1G22650	A/N-INVD	Alkaline/neutral invertase D	60.867	29	19	63.7	41.4	1631300000	92478000	433;799;946;965;1096;1208;1304;1447;1677;1710;1961;2263;2300;2301;2495;2496;2685;2711;2774;2825;3020;3060;3124;3145;3173;3360;3468;3662;3742	False;True;True;True;True;True;True;True;False;True;False;True;True;True;True;True;True;False;True;True;True;False;False;False;True;False;True;True;False	434;803;952;971;1102;1215;1312;1456;1688;1721;1973;1974;2277;2315;2316;2513;2514;2703;2729;2793;2844;3039;3079;3144;3165;3193;3380;3488;3683;3767	629;630;1170;1417;1443;1444;1709;1908;2047;2048;2295;2296;2666;2741;3144;3145;3146;3147;3588;3638;3639;3640;3641;3642;3966;3967;3968;4275;4307;4308;4405;4510;4823;4874;4972;4973;4999;5000;5063;5351;5524;5525;5798;5943;5944	668;669;1247;1526;1554;1555;1908;2138;2281;2282;2550;2551;2951;3032;3485;3486;3487;3488;3955;4009;4010;4011;4012;4013;4379;4380;4381;4720;4752;4753;4851;4970;5313;5365;5465;5466;5492;5493;5573;5898;6132;6133;6134;6424;6594;6595	669;1247;1526;1554;1908;2138;2281;2550;2951;3032;3487;3955;4010;4013;4379;4381;4720;4752;4851;4970;5313;5365;5466;5492;5573;5898;6134;6424;6594	131;132;133;134;135;136;137;138;139;140;141;142	1;41;69;122;272;274;285;299;344;401;504;514
AT1G77760	NIA1	Nitrate reductase 1	103.04	27	10	35.6	11.9	1534700000	20175000	355;428;439;636;653;679;754;856;994;1046;1070;1125;1172;1188;1388;1400;1402;1744;2067;2362;2613;2614;2670;2942;3118;3278;3477	True;True;True;True;True;True;True;True;True;True;True;True;True;True;True;True;True;True;False;True;True;True;True;True;True;False;True	355;429;440;640;657;683;758;861;1000;1052;1076;1132;1179;1195;1397;1409;1411;1755;2080;2377;2631;2632;2688;2961;3138;3298;3497	516;623;636;939;967;998;1113;1247;1557;1619;1652;1776;1853;1854;1874;1875;2216;2230;2232;2790;3299;3300;3738;3739;4174;4175;4252;4711;4961;5225;5226;5539	548;662;675;1006;1035;1066;1189;1327;1745;1808;1843;1999;2082;2083;2103;2104;2471;2485;2487;3081;3654;3655;4127;4128;4616;4617;4695;5198;5454;5755;5756;6149	548;662;675;1006;1035;1066;1189;1327;1745;1808;1843;1999;2082;2103;2471;2485;2487;3081;3655;4127;4616;4617;4695;5198;5454;5756;6149	330;335;336;337;338;339	136;179;274;276;516;547
AT5G20280	SPS1F	Sucrose-phosphate synthase 1F	117.32	33	29	40.7	33.7	1459600000	104050000	88;178;373;435;449;459;526;717;975;1049;1273;1393;1463;1549;1686;1763;1767;1772;1916;1976;2163;2239;2252;2402;2580;2655;2681;2810;2999;3496;3660;3719;3816	True;True;True;True;True;True;True;True;True;True;True;True;True;True;True;True;True;True;True;True;True;True;True;True;True;True;True;True;True;True;True;True;True	88;178;374;436;450;460;527;721;981;1055;1281;1402;1472;1560;1697;1774;1778;1783;1927;1989;2177;2253;2266;2417;2598;2673;2699;2829;3018;3516;3681;3744;3841	151;152;274;543;632;654;666;764;1061;1461;1624;2001;2002;2223;2314;2448;2449;2681;2825;2829;2834;2835;3066;3166;3460;3461;3559;3576;3786;4118;4225;4270;4485;4486;4795;5566;5567;5796;5913;5914;6041	171;172;297;575;671;694;706;812;1133;1572;1813;2235;2236;2478;2569;2716;2717;2966;3116;3120;3125;3126;3376;3507;3824;3825;3926;3943;4175;4550;4667;4715;4945;4946;5283;6182;6183;6184;6422;6564;6565;6698	172;297;575;671;694;706;812;1133;1572;1813;2235;2478;2569;2716;2966;3116;3120;3125;3376;3507;3824;3926;3943;4175;4550;4667;4715;4945;5283;6184;6422;6565;6698	224;659;660;661;662;663;664;665;666;667;668	80;184;209;237;250;478;514;523;716;723;969
AT1G72410		COP1- interacting protein	130	33	8	31.1	8.9	1197700000	10347000	33;281;454;484;625;766;767;769;834;898;970;1007;1700;1819;1927;2070;2071;2125;2138;2164;2179;2391;2421;2609;2650;2728;2931;2968;2983;2984;3047;3780;3790	True;True;True;True;True;True;True;True;True;True;True;True;True;True;True;True;True;True;True;True;True;True;True;True;True;True;True;True;True;True;True;True;True	33;281;455;485;629;770;771;773;838;904;976;1013;1711;1830;1939;2083;2084;2138;2151;2178;2193;2406;2438;2627;2668;2746;2950;2987;3002;3003;3066;3805;3815	49;410;659;695;925;1126;1127;1128;1130;1131;1220;1332;1333;1452;1574;2714;2921;3098;3099;3303;3304;3305;3383;3403;3404;3462;3479;3773;3824;4168;4219;4332;4333;4696;4740;4775;4776;4777;4859;5999;6010	58;437;699;735;991;1202;1203;1204;1206;1207;1300;1437;1438;1563;1762;3001;3220;3432;3433;3434;3658;3659;3660;3746;3766;3767;3826;3843;4162;4217;4608;4661;4777;4778;5183;5228;5263;5264;5265;5349;6656;6667	58;437;699;735;991;1202;1204;1207;1300;1438;1563;1762;3001;3220;3434;3658;3660;3746;3767;3826;3843;4162;4217;4608;4661;4777;5183;5228;5264;5265;5349;6656;6667	152;153;154;155	202;442;631;691
AT1G08680	AGD14	ADP-ribosylation factor GTPase-activating protein AGD14	71.559	14	13	24.9	33.2	1031800000	128370000	266;533;821;972;1595;1810;2647;2786;2955;3025;3041;3280;3684;3685	True;True;True;True;True;True;True;True;True;True;True;True;True;True	266;534;825;978;1606;1821;2665;2805;2974;3044;3060;3300;3705;3706	383;774;1204;1454;1455;1456;1457;2545;2904;4215;4216;4433;4725;4726;4829;4851;5228;5833;5834;5835	408;409;822;1282;1565;1566;1567;1568;2822;3202;4657;4658;4893;5213;5214;5319;5341;5758;6464;6465;6466	408;822;1282;1568;2822;3202;4657;4893;5214;5319;5341;5758;6465;6466	127;128;129	144;204;284
AT3G19960	ATM1	Myosin-1	131.13	35	10	33.1	10.8	1019000000	13997000	4;110;286;366;599;710;712;828;873;1110;1433;1570;1630;1917;1951;1957;1982;2083;2126;2197;2202;2601;2846;2847;2860;2937;2962;3063;3190;3236;3390;3613;3639;3676;3768	True;True;True;True;True;True;True;True;True;True;True;True;True;True;True;True;True;True;True;True;True;True;True;True;True;True;True;True;True;True;True;True;True;True;True	4;110;286;366;603;714;716;832;878;1117;1442;1581;1641;1928;1963;1969;1995;2096;2139;2211;2216;2619;2865;2866;2879;2956;2981;3082;3210;3256;3410;3634;3660;3697;3793	6;179;416;531;886;887;1051;1052;1054;1055;1213;1271;1734;2273;2274;2507;2603;3067;3132;3133;3139;3172;3329;3384;3503;3511;4151;4152;4542;4543;4544;4563;4703;4733;4877;5096;5172;5424;5731;5767;5822;5986;5987	6;199;443;563;950;951;1123;1124;1126;1127;1291;1352;1935;2528;2529;2780;2885;3377;3473;3474;3480;3513;3689;3747;3868;3876;4589;4590;5003;5004;5005;5026;5190;5221;5368;5607;5698;6028;6356;6392;6451;6642;6643	6;199;443;563;951;1124;1126;1291;1352;1935;2528;2780;2885;3377;3474;3480;3513;3689;3747;3868;3876;4590;5003;5004;5026;5190;5221;5368;5607;5698;6028;6356;6392;6451;6643	143;145;791;792;793;794	9;193;270;721;1067;1150
AT3G47950, AT5G62670	AHA4, AHA11	H+-ATPase 4, plasma membrane-type, H+-ATPase 11, plasma membrane-type	105.12	39	32	41	36	955970000	77756000	49;51;189;426;666;743;824;1030;1035;1104;1182;1257;1309;1310;1346;1347;1457;1685;1726;1727;1857;1936;2014;2140;2177;2290;2342;2443;2596;2725;2752;2886;3093;3134;3148;3150;3191;3484;3669	False;False;False;True;True;True;True;True;True;True;True;True;False;False;True;True;True;False;True;True;True;True;False;False;False;False;False;True;True;False;True;True;True;True;False;True;True;True;True	49;51;189;427;670;747;828;1036;1041;1111;1189;1265;1317;1318;1355;1356;1466;1696;1737;1738;1868;1948;2027;2153;2191;2304;2357;2460;2614;2743;2770;2905;3113;3154;3168;3170;3211;3504;3690	74;76;285;621;981;1096;1097;1208;1601;1602;1608;1719;1866;1981;1982;2056;2057;2123;2124;2125;2308;2679;2680;2766;2767;2768;2984;2985;3109;3223;3406;3407;3477;3622;3705;3869;4144;4145;4329;4369;4625;4928;4984;5004;5007;5008;5097;5098;5549;5550;5815	83;85;308;660;1049;1169;1170;1286;1789;1790;1796;1920;2095;2214;2215;2290;2291;2362;2363;2364;2563;2964;2965;3057;3058;3059;3292;3293;3444;3576;3769;3770;3841;3990;3991;4092;4271;4581;4582;4774;4814;5101;5420;5477;5497;5500;5501;5608;5609;6159;6160;6444	83;85;308;660;1049;1170;1286;1790;1796;1920;2095;2214;2290;2291;2362;2364;2563;2964;3058;3059;3292;3444;3576;3769;3841;3991;4092;4271;4581;4774;4814;5101;5420;5477;5497;5500;5609;6159;6444	120;121;122;123;365;824;825	318;324;327;365;513;589;913
AT5G65430	GRF8	14-3-3-like protein GF14 kappa	28.028	16	12	74.6	45.4	803490000	116100000	27;506;521;537;1675;1676;1759;1843;2009;2294;2446;2513;2565;2882;3430;3710	True;False;False;False;False;False;True;False;True;False;False;False;False;True;False;True	27;507;522;538;1686;1687;1770;1854;2022;2308;2463;2531;2583;2901;3450;3735	39;40;739;759;779;780;781;782;783;784;2663;2664;2665;2811;2812;2952;3208;3209;3627;3628;3872;3873;3874;3875;3993;4094;4095;4619;4620;5474;5898;5899	47;48;49;787;807;827;828;829;830;831;832;833;834;835;836;837;838;839;840;841;2948;2949;2950;3102;3103;3251;3558;3559;3996;3997;4274;4275;4276;4277;4278;4279;4280;4281;4282;4406;4526;4527;5095;5096;6082;6548;6549	49;787;807;830;2948;2950;3103;3251;3559;3996;4274;4406;4527;5096;6082;6548	162;427;441;442;443;444;445	13;26;30;130;227;241;245
AT4G24100	AT4G24100	Protein kinase superfamily protein	78.746	26	6	42.5	10.9	782800000	7845400	52;108;149;166;282;382;383;760;776;791;988;991;1272;1893;1934;2042;2061;2251;2338;2792;2907;2908;3314;3516;3517;3599	True;True;True;True;True;True;True;True;True;True;True;True;True;True;True;True;True;True;True;True;True;True;True;True;True;True	52;108;149;166;282;383;384;764;780;795;994;997;1280;1904;1946;2055;2074;2265;2353;2811;2926;2927;3334;3536;3537;3619	77;177;234;255;411;552;553;554;1119;1139;1156;1157;1549;1554;2000;3034;3107;3268;3292;3293;3574;3575;3695;3696;4452;4661;4662;4663;5278;5589;5590;5713	86;197;254;275;438;584;585;586;1195;1215;1232;1233;1737;1742;2234;3342;3442;3623;3647;3648;3941;3942;4081;4082;4912;5147;5148;5149;5818;6208;6209;6338	86;197;254;275;438;584;586;1195;1215;1233;1737;1742;2234;3342;3442;3623;3648;3941;4081;4912;5147;5149;5818;6208;6209;6338	231;612;613;614;615;616;617;618	36;83;246;270;273;334;407;439
AT5G47480	AT5G47480	MAIGO 5	145.88	30	7	25.5	6.4	735720000	10266000	77;377;788;800;957;1539;1625;1889;1949;1950;2035;2137;2303;2396;2619;2733;2809;2824;2855;2891;2950;2985;3053;3189;3252;3253;3254;3290;3300;3692	True;True;True;True;True;True;True;True;True;True;True;True;True;True;True;True;True;True;True;True;True;True;True;True;True;True;True;True;True;True	77;378;792;804;963;1549;1636;1900;1961;1962;2048;2150;2318;2411;2637;2751;2828;2843;2874;2910;2969;3004;3072;3209;3272;3273;3274;3310;3320;3713	117;547;1153;1171;1434;2425;2426;2427;2598;3030;3130;3131;3256;3401;3402;3644;3779;4183;4339;4484;4509;4556;4557;4635;4720;4778;4866;5095;5191;5192;5193;5194;5246;5258;5842	127;579;1229;1248;1544;2692;2693;2694;2880;3338;3470;3471;3472;3610;3764;3765;4015;4168;4625;4784;4944;4969;5018;5019;5020;5115;5207;5266;5357;5606;5717;5718;5719;5720;5778;5791;6473	127;579;1229;1248;1544;2692;2880;3338;3470;3472;3610;3765;4015;4168;4625;4784;4944;4969;5020;5115;5207;5266;5357;5606;5717;5718;5720;5778;5791;6473	728;732;733;734;735;736	123;622;632;814;896;927
AT5G14720	AT5G14720	Protein kinase superfamily protein	75.363	21	4	40.2	9.6	581140000	9042300	203;271;539;763;780;1034;1127;1414;1655;1708;1828;2241;2406;2640;2707;2814;2873;3068;3169;3615;3751	True;True;True;True;True;True;True;True;True;True;True;True;True;True;True;True;True;True;True;True;True	203;271;540;767;784;1040;1134;1423;1666;1719;1839;2255;2421;2658;2725;2833;2892;3087;3189;3636;3776	301;302;389;390;786;787;788;1122;1143;1607;1779;2246;2637;2638;2739;2934;3561;3562;3790;3791;4208;4303;4495;4590;4882;5059;5734;5967	324;325;415;416;843;844;845;1198;1219;1795;2002;2501;2921;2922;3030;3233;3928;3929;4179;4180;4650;4748;4955;5059;5373;5569;6359;6623	324;415;843;1198;1219;1795;2002;2501;2922;3030;3233;3929;4179;4650;4748;4955;5059;5373;5569;6359;6623	574;575;576;577	164;253;313;639
AT5G54440	CLUB	TRAPII tethering factor	140.68	13	2	12.9	2.8	571590000	1354500	11;79;226;244;1341;2088;2544;2553;3155;3170;3209;3697;3763	True;True;True;True;True;True;True;True;True;True;True;True;True	11;79;226;244;1350;2101;2562;2571;3175;3190;3229;3720;3788	15;16;17;121;329;330;354;2117;3334;3335;4051;4061;5015;5060;5132;5856;5980	15;16;17;131;352;353;378;2356;3694;3695;4471;4481;5513;5570;5656;6491;6636	16;131;352;378;2356;3695;4471;4481;5513;5570;5656;6491;6636	253	882
AT5G47490	AT5G47490	RGPR-related	147.81	18	5	15.9	5.5	558190000	7327500	418;789;798;1174;1518;1625;1889;2214;2303;2397;2583;2594;2626;2949;3154;3255;3327;3806	True;True;True;True;True;False;False;True;False;True;True;True;True;True;True;True;True;True	419;793;802;1181;1527;1636;1900;2228;2318;2412;2601;2612;2644;2968;3174;3275;3347;3831	608;1154;1169;1856;1857;2384;2385;2598;3030;3525;3644;3780;4127;4142;4190;4719;5014;5195;5294;6029	646;1230;1246;2085;2086;2643;2644;2880;3338;3892;4015;4169;4562;4579;4632;5206;5512;5721;5834;6686	646;1230;1246;2086;2644;2880;3338;3892;4015;4169;4562;4579;4632;5206;5512;5721;5834;6686	728;729;730;731	625;940;988;1066
AT1G43700	VIP1	VirE2-interacting protein 1	37.791	10	6	35.5	23.8	516820000	11888000	243;403;911;1191;1803;1836;2105;3574;3622;3799	True;True;True;True;True;True;True;True;True;True	243;404;917;1198;1814;1847;2118;3594;3643;3824	353;584;585;1357;1880;2894;2895;2942;2943;3355;5683;5741;6022	377;622;623;1463;2109;3192;3193;3241;3242;3718;6306;6366;6679	377;622;1463;2109;3193;3241;3718;6306;6366;6679	850;851;852	19;242;312
AT2G21230	BZIP30	Basic leucine zipper 30	56.326	16	8	32.2	17	442820000	12073000	102;529;1385;1835;2078;2079;2106;2216;2217;2368;2405;2954;3348;3543;3576;3762	True;True;True;True;True;True;True;True;True;True;True;True;True;True;True;True	102;530;1394;1846;2091;2092;2119;2230;2231;2383;2420;2973;3368;3563;3596;3787	169;767;2211;2212;2941;3322;3323;3356;3528;3529;3745;3789;4724;5330;5629;5685;5979	189;815;2466;2467;3240;3682;3683;3719;3895;3896;4134;4178;5212;5877;6250;6308;6635	189;815;2466;3240;3682;3683;3719;3895;3896;4134;4178;5212;5877;6250;6308;6635	9;10;11;12;13	241;368;395;424;440
AT4G30190	AHA2	H+-ATPase 2, plasma membrane-type	104.4	42	38	42.7	35.8	419020000	49398000	14;49;51;189;357;407;519;610;667;825;826;1029;1103;1260;1309;1310;1360;1361;1390;1594;1685;1728;1729;1935;1948;2014;2015;2140;2177;2290;2342;2454;2725;2991;3092;3105;3148;3193;3395;3416;3485;3677	False;False;False;False;True;True;False;True;False;False;False;True;True;False;False;False;False;False;False;False;False;False;False;False;True;False;False;False;False;False;False;False;False;True;True;True;False;False;False;False;False;False	14;49;51;189;357;408;520;614;671;829;830;1035;1110;1268;1317;1318;1369;1370;1399;1605;1696;1739;1740;1947;1960;2027;2028;2153;2191;2304;2357;2471;2743;3010;3112;3125;3168;3213;3415;3436;3505;3698	20;21;22;74;76;285;518;589;756;900;982;983;1209;1210;1211;1599;1600;1718;1986;1987;2056;2057;2145;2146;2147;2148;2219;2220;2544;2679;2680;2769;2770;3108;3128;3129;3223;3224;3406;3407;3477;3622;3705;3885;3886;4329;4784;4926;4927;4942;5004;5100;5430;5458;5551;5552;5823	20;21;22;83;85;308;550;627;804;964;1050;1051;1287;1288;1289;1787;1788;1919;2220;2221;2290;2291;2384;2385;2386;2387;2474;2475;2819;2820;2821;2964;2965;3060;3061;3443;3468;3469;3576;3577;3769;3770;3841;3990;3991;4092;4292;4293;4774;5272;5418;5419;5435;5497;5611;6036;6065;6066;6161;6162;6452	21;83;85;308;550;627;804;964;1051;1287;1289;1787;1919;2220;2290;2291;2384;2386;2474;2820;2964;3060;3061;3443;3469;3576;3577;3769;3841;3991;4092;4293;4774;5272;5419;5435;5497;5611;6036;6066;6162;6452	120;121;122;123;359;360;361;362;363;364	314;320;323;364;378;381;509;527;531;585
AT4G38900	BZIP29	Basic leucine zipper 29	60.413	12	8	26.9	19	398130000	12356000	13;402;1840;1841;1850;1969;2107;2479;2639;2980;3054;3577	True;True;True;True;True;True;True;True;True;True;True;True	13;403;1851;1852;1861;1982;2120;2497;2657;2999;3073;3597	19;583;2948;2949;2950;2961;3157;3357;3939;4206;4207;4771;4867;5686;5687	19;621;3247;3248;3249;3265;3498;3720;4350;4648;4649;5259;5358;6309;6310	19;621;3247;3248;3265;3498;3720;4350;4649;5259;5358;6310	585;586;587;588	327;390;392;464
AT5G57350	AHA3	H+-ATPase 3, plasma membrane-type	104.45	36	28	38.6	33.2	388220000	50830000	14;49;51;665;696;747;1028;1103;1183;1259;1309;1310;1346;1347;1362;1594;1685;1726;1727;1935;1947;2014;2120;2121;2140;2177;2342;2638;2725;3148;3192;3394;3416;3485;3678;3736	False;False;False;True;True;True;True;False;True;True;False;False;False;False;True;False;False;False;False;False;True;False;True;True;False;False;False;True;False;False;True;True;False;False;True;True	14;49;51;669;700;751;1034;1110;1190;1267;1317;1318;1355;1356;1371;1605;1696;1737;1738;1947;1959;2027;2133;2134;2153;2191;2357;2656;2743;3168;3212;3414;3436;3505;3699;3761	20;21;22;74;76;980;1033;1101;1598;1718;1867;1984;1985;2056;2057;2123;2124;2125;2149;2544;2679;2680;2766;2767;2768;3108;3127;3223;3372;3373;3374;3375;3376;3377;3406;3407;3477;3705;4205;4329;5004;5099;5429;5458;5551;5552;5824;5935	20;21;22;83;85;1048;1104;1175;1786;1919;2096;2217;2218;2219;2290;2291;2362;2363;2364;2388;2819;2820;2821;2964;2965;3057;3058;3059;3443;3467;3576;3735;3736;3737;3738;3739;3740;3769;3770;3841;4092;4647;4774;5497;5610;6035;6065;6066;6161;6162;6453;6586	21;83;85;1048;1104;1175;1786;1919;2096;2217;2290;2291;2362;2364;2388;2820;2964;3058;3059;3443;3467;3576;3736;3739;3769;3841;4092;4647;4774;5497;5610;6035;6066;6162;6453;6586	121;122;123;363;364;365;366;367;368	315;321;324;379;382;528;532;547;586
AT2G31370	POSF21	Basic leucine zipper	44.689	10	7	44.5	28.4	385840000	24605000	385;545;945;1399;1804;2127;2129;2395;2590;3577	True;True;True;True;True;True;True;True;True;False	386;546;951;1408;1815;2140;2142;2410;2608;3597	556;794;1416;2229;2896;3385;3387;3778;4136;4137;5686;5687	588;852;1525;2484;3194;3748;3750;4167;4573;4574;6309;6310	588;852;1525;2484;3194;3748;3750;4167;4574;6310	503;504;505;506;507;508;509	131;132;163;167;172;174;271
AT1G19000	AT1G19000	Homeodomain-like superfamily protein	31.23	6	6	22.5	28.4	379760000	15630000	425;1270;2693;2998;3125;3259	True;True;True;True;True;True	426;1278;2711;3017;3145;3279	620;1997;1998;4284;4794;4974;5199;5200	659;2231;2232;4729;5282;5467;5725;5726	659;2232;4729;5282;5467;5726	797	23
AT2G43140	BHLH129	Basic helix loop helix protein	33.803	7	4	27.8	19.7	340600000	7662500	982;1150;1628;1753;2114;2407;3011	True;True;True;True;True;True;True	988;1157;1639;1764;2127;2422;3030	1477;1478;1812;2601;2804;3364;3792;4812;4813	1600;1601;2035;2883;3095;3727;4181;5300;5301	1601;2035;2883;3095;3727;4181;5301	174;175	164;267
AT5G61960	ML1	Protein MEI2-like 1	100.79	18	6	28.1	9.2	338180000	6144300	0;384;1023;1059;1083;1274;2118;2124;2258;2302;2951;3089;3136;3201;3287;3371;3506;3803	True;True;True;True;True;True;True;True;True;True;True;True;True;True;True;True;True;True	0;385;1029;1065;1089;1282;2131;2137;2272;2317;2970;3109;3156;3221;3307;3391;3526;3828	0;555;1592;1638;1678;2003;3370;3382;3582;3643;4721;4921;4989;5117;5240;5377;5577;6026	0;587;1780;1827;1872;2237;3733;3745;3949;4014;5208;5413;5482;5637;5770;5969;6194;6683	0;587;1780;1827;1872;2237;3733;3745;3949;4014;5208;5413;5482;5637;5770;5969;6194;6683	627;628;629;630;631;632;633;634	112;116;257;670;695;698;759;844
AT4G39420	AT4G39420	unknown protein	355.03	37	15	13.7	7.7	329140000	14216000	5;59;117;121;193;305;340;523;570;571;673;841;901;958;969;1293;1348;1459;1491;1502;1800;1834;1864;1907;1995;2034;2228;2347;2387;2485;2678;3059;3115;3403;3480;3537;3778	True;True;True;True;True;True;True;True;True;True;True;True;True;True;True;True;True;True;True;True;True;True;True;True;True;True;True;True;True;True;True;True;True;True;True;True;True	5;59;117;121;193;305;340;524;573;574;677;845;907;964;975;1301;1357;1468;1500;1511;1811;1845;1875;1918;2008;2047;2242;2362;2402;2503;2696;3078;3135;3423;3500;3557;3803	7;94;188;195;289;444;497;761;831;832;990;991;1228;1337;1435;1451;2034;2126;2310;2351;2366;2891;2940;2995;3054;3188;3255;3542;3717;3769;3948;4267;4873;4956;4957;5442;5544;5621;5997	7;104;208;215;312;472;529;809;889;890;1058;1059;1308;1442;1545;1562;2268;2365;2565;2610;2625;3189;3239;3303;3363;3529;3609;3909;4105;4158;4360;4712;5364;5449;5450;6048;6154;6242;6654	7;104;208;215;312;472;529;809;889;890;1058;1308;1442;1545;1562;2268;2365;2565;2610;2625;3189;3239;3303;3363;3529;3609;3909;4105;4158;4360;4712;5364;5449;6048;6154;6242;6654	240;241;242;243;244;245;246;247;248;249;250;251	519;650;807;840;845;860;1110;2163;2202;2223;2634;2650
AT5G07290	ML4	Protein MEI2-like 4	99.889	13	7	19.1	11.6	322610000	10958000	215;1233;1269;1323;1846;2247;2298;2471;2548;2769;2952;3366;3473	True;True;True;True;True;True;True;True;True;True;True;True;True	215;1241;1277;1332;1857;2261;2313;2489;2566;2787;2971;3386;3493	318;1949;1950;1996;2075;2957;3569;3634;3928;4055;4390;4722;5371;5533	341;2180;2181;2230;2309;3261;3936;4003;4337;4475;4835;5209;5963;6142	341;2181;2230;2309;3261;3936;4003;4337;4475;4835;5209;5963;6142	832;833;834;835;836;837;838;839;840	37;114;389;399;517;518;693;757;842
AT4G10730	AT4G10730	Protein kinase superfamily protein	78.426	19	3	34.3	5.5	322420000	757340	41;52;109;149;166;265;382;383;628;751;987;1156;1855;1934;2062;2293;3023;3516;3517	True;False;True;False;False;True;False;False;True;True;True;True;True;False;True;True;True;False;False	41;52;109;149;166;265;383;384;632;755;993;1163;1866;1946;2075;2307;3042;3536;3537	65;77;178;234;255;382;552;553;554;928;929;1110;1548;1818;2982;3107;3294;3625;3626;4826;5589;5590	74;86;198;254;275;407;584;585;586;994;995;1186;1736;2041;3290;3442;3649;3994;3995;5316;6208;6209	74;86;198;254;275;407;584;586;994;1186;1736;2041;3290;3442;3649;3995;5316;6208;6209	227;228;229;230;231	50;150;260;348;681
AT5G11110	SPS2F	Sucrose-phosphate synthase 2F	116.96	22	12	24.2	13.7	304520000	12849000	88;178;197;632;718;1049;1099;1343;1764;1772;1915;1975;2091;2240;2585;2850;3065;3312;3412;3495;3718;3816	False;False;True;True;True;False;True;True;True;False;True;True;True;True;True;True;True;True;True;True;True;False	88;178;197;636;722;1055;1106;1352;1775;1783;1926;1988;2104;2254;2603;2869;3084;3332;3432;3515;3743;3841	151;152;274;294;295;935;1062;1624;1714;2119;2120;2826;2834;2835;3065;3164;3165;3339;3560;4129;4549;4879;5276;5453;5565;5912;6041	171;172;297;317;318;1002;1134;1813;1915;2358;2359;3117;3125;3126;3375;3505;3506;3699;3700;3927;4564;5010;5370;5816;6059;6181;6563;6698	172;297;318;1002;1134;1813;1915;2359;3117;3125;3375;3505;3700;3927;4564;5010;5370;5816;6059;6181;6563;6698	224;659;665;782;783;784;785	191;216;297;480;516;551;1011
AT1G58110	AT1G58110	Basic leucine zipper	42.1	13	7	42.5	24.6	303760000	13457000	205;528;1592;1755;1766;2375;2440;2444;2519;2525;2615;2710;3584	True;True;True;True;True;True;True;True;True;True;True;True;True	205;529;1603;1766;1777;2390;2457;2461;2537;2543;2633;2728;3604	305;306;766;2542;2806;2828;3753;3866;3870;4017;4024;4176;4306;5697	328;329;814;2817;3097;3119;4142;4267;4268;4272;4433;4442;4618;4751;6322	329;814;2817;3097;3119;4142;4268;4272;4433;4442;4618;4751;6322	148;149	191;287
AT1G64500	AT1G64500	protein involved in light stimulated actin bundling	41.016	7	2	26.6	9	283110000	3512900	137;567;741;882;2141;2857;3752	True;True;True;True;True;True;True	137;570;745;887;2154;2876;3777	221;828;1094;1311;3408;3409;4560;5968	241;886;1167;1416;3771;3772;5023;6624	241;886;1167;1416;3772;5023;6624	868;869;870	138;238;291
AT1G19350	BZR2	Brassinazole-resistant 2	36.485	10	2	37.3	7.8	281140000	872060	163;245;885;1100;1302;1716;2401;2481;3274;3435	True;True;True;True;True;True;True;True;True;True	163;245;891;1107;1310;1727;2416;2499;3294;3455	252;355;1318;1319;1715;2045;2749;2750;3785;3941;3942;5218;5219;5481	272;379;1423;1424;1916;2279;3040;3041;4174;4352;4353;5748;5749;6089	272;379;1424;1916;2279;3040;4174;4353;5748;6089	798;799	18;97
AT1G01620, AT2G45960, AT3G61430, AT4G00430,	PIP1C, PIP1B, PIP1A, PIP1E,	Plasma membrane intrinsic protein 1C, plasma membrane intrinsic protein 1B, plasma membrane intrinsic protein 1A, plasma membrane intrinsic protein 1E	30.688	4	2	14.7	8.2	265570000	4862100	2262;2641;2898;3432	True;True;True;True	2276;2659;2917;3452	3587;4209;4642;5477;5478	3954;4651;5122;6085;6086	3954;4651;5122;6086	472	1
AT3G01280	VDAC1	Voltage dependent anion channel 1	29.425	14	16	63.8	66.7	259800000	227480000	472;536;620;978;1037;1038;1184;1185;1583;1712;2817;3384;3482;3541	True;True;True;True;True;True;True;True;True;True;True;True;True;True	473;537;624;984;1043;1044;1191;1192;1594;1723;2836;3404;3502;3561	682;777;778;919;1465;1610;1611;1868;1869;1870;2531;2743;4499;4500;4501;5413;5546;5626;5627	722;825;826;985;1576;1798;1799;2097;2098;2099;2806;3034;4959;4960;4961;6016;6156;6247;6248	722;825;985;1576;1798;1799;2097;2099;2806;3034;4959;6016;6156;6247
AT2G40620	BZIP18	Basic leucine zipper 18	40.666	8	3	24	10.9	247540000	22589000	404;405;1839;1958;2130;2136;2790;3575	True;True;True;True;True;True;True;True	405;406;1850;1970;2143;2149;2809;3595	586;587;2947;3140;3388;3400;4449;4450;5684	624;625;3246;3481;3751;3763;4909;4910;6307	624;625;3246;3481;3751;3763;4909;6307	276	218
AT2G15900	AT2G15900	Phox-associated domain protein	113.72	15	1	17.9	1.6	243380000	857490	208;336;453;603;1495;1657;1806;1943;2077;2390;2663;2664;2993;3208;3633	True;True;True;True;True;True;True;True;True;True;True;True;True;True;True	208;336;454;607;1504;1668;1817;1955;2090;2405;2681;2682;3012;3228;3654	309;492;493;658;892;2355;2356;2640;2898;3122;3123;3321;3772;4238;4239;4240;4786;4787;5131;5759;5760	332;524;525;698;956;2614;2615;2924;3196;3462;3463;3681;4161;4681;4682;4683;5274;5275;5655;6384;6385	332;525;698;956;2615;2924;3196;3463;3681;4161;4681;4683;5274;5655;6384	156;157;158	4;147;415
AT3G03160	AT3G03160	unknown protein	14.843	3	4	25.4	26.2	243160000	36695000	1154;1471;3714	True;True;True	1161;1480;3739	1816;2324;2325;5906;5907	2039;2579;2580;6557;6558	2039;2579;6558	848	66
AT3G07330	CSLC6	Cellulose-synthase like C6	78.37	7	4	11.3	7.2	238690000	18259000	21;167;877;897;1545;3241;3658	True;True;True;True;True;True;True	21;167;882;903;1556;3261;3679	29;256;1276;1331;2442;2443;5178;5179;5793;5794	29;276;1357;1436;2710;2711;5704;5705;6419;6420	29;276;1357;1436;2711;5704;6420	888;889;890	204;304;561
AT3G03950	ECT1	Evolutionary conserved C-terminal region 1	47.812	8	4	23.1	11.1	238160000	10221000	547;1357;1396;1747;2576;3067;3217;3722	True;True;True;True;True;True;True;True	548;1366;1405;1758;2594;3086;3237;3747	796;2139;2140;2141;2226;2797;4114;4881;5142;5917	854;2378;2379;2380;2481;3088;4546;5372;5666;6568	854;2379;2481;3088;4546;5372;5666;6568	202	317
AT4G27060	TOR1	Microtubule-associated protein TORTIFOLIA1	94.003	12	6	19.4	10.5	217470000	12748000	1;480;607;804;1831;2054;2148;2351;2669;3028;3342;3641	True;True;True;True;True;True;True;True;True;True;True;True	1;481;611;808;1842;2067;2161;2366;2687;3047;3362;3662	1;2;691;896;1176;2937;3283;3432;3722;4251;4833;5321;5322;5769	1;2;731;960;1253;3236;3638;3795;4110;4694;5323;5868;5869;6394	2;731;960;1253;3236;3638;3795;4110;4694;5323;5868;6394	915;916;917	193;195;198
AT4G03260	MASP1	Microtubule associated stress protein 1	74.692	10	1	14.8	2.4	212250000	1260400	925;1145;1626;1647;1959;2419;2500;2747;3389;3494	True;True;True;True;True;True;True;True;True;True	931;1152;1637;1658;1971;2436;2518;2765;3409;3514	1379;1806;2599;2627;3141;3820;3821;3973;4358;4359;5423;5564	1485;2029;2881;2911;3482;4213;4214;4386;4803;4804;6027;6180	1485;2029;2881;2911;3482;4214;4386;4804;6027;6180
AT1G05805	AKS2	ABA-responsive kinase substrate 2	38.951	7	3	27.1	11.9	191500000	3817900	513;1149;2110;2468;2793;2964;3061	True;True;True;True;True;True;True	514;1156;2123;2486;2812;2983;3080	750;1810;1811;3360;3925;4453;4735;4736;4875	798;2033;2034;3723;4334;4913;5223;5224;5366	798;2033;3723;4334;4913;5223;5366	583	319
AT3G05200	ATL6	Arabidopsis toxicos en levadura 6	43.274	6	4	20.4	11.6	191480000	6945700	263;307;1047;1303;2722;3016	True;True;True;True;True;True	263;307;1053;1311;2740;3035	380;446;1620;2046;4325;4818	405;474;1809;2280;4770;5306	405;474;1809;2280;4770;5306
AT2G37550	AGD7	ADP-ribosylation factor GTPase-activating protein 7	49.251	12	1	35.7	4.6	185050000	2207100	661;1144;1266;1774;2087;2246;2941;3055;3094;3207;3769;3807	True;True;True;True;True;True;True;True;True;True;True;True	665;1151;1274;1785;2100;2260;2960;3074;3114;3227;3794;3832	976;1805;1993;2837;3333;3568;4710;4868;4929;4930;5130;5988;6030	1044;2028;2227;3128;3693;3935;5197;5359;5421;5422;5423;5654;6644;6687	1044;2028;2227;3128;3693;3935;5197;5359;5421;5654;6644;6687	301;302;303;304	61;216;260;324
AT1G15040	GAT1_2.1	Glutamine amidotransferase 1_2.1	45.362	10	2	26.3	4.6	182850000	1614200	118;119;334;1661;1746;1785;1928;2025;2097;2827	True;True;True;True;True;True;True;True;True;True	118;119;334;1672;1757;1796;1940;2038;2110;2846	189;190;490;2645;2646;2796;2854;3100;3245;3246;3346;4512	209;210;522;2930;2931;3087;3146;3435;3599;3600;3707;4972	209;210;522;2930;3087;3146;3435;3600;3707;4972	579;580;581;582	106;193;196;289
AT1G12360	KEU, SEC11	SNARE-interacting sec1 protein KEULE	75.082	12	7	19.2	12.6	176280000	13405000	168;1294;1441;1497;1748;1824;2178;2344;2510;2889;3757;3810	True;True;True;True;True;True;True;True;True;True;True;True	168;1302;1450;1506;1759;1835;2192;2359;2528;2908;3782;3835	257;2035;2286;2358;2798;2930;3478;3712;3989;4628;5973;6033	277;2269;2541;2617;3089;3229;3842;4099;4402;5104;6629;6690	277;2269;2541;2617;3089;3229;3842;4099;4402;5104;6629;6690	700;701;702;703	218;334;465;471
AT5G22740	CSLA2	Cellulose synthase -like A 2	51.469	1	1	2.5	2.8	164750000	990970	3301	TRUE	3321	5259	5792	5792	565	206
AT4G18010	IP5PII	Inositol (1,4,5)P3 5-phosphatase II	70.08	11	3	21.5	6.2	154870000	3505700	181;564;796;1220;2084;2085;2095;2255;2332;2701;3686	True;True;True;True;True;True;True;True;True;True;True	181;567;800;1228;2097;2098;2108;2269;2347;2719;3707	277;825;1163;1164;1928;1929;3330;3331;3344;3579;3679;4296;5836	300;883;1240;1241;2159;2160;3690;3691;3705;3946;4050;4741;6467	300;883;1241;2159;3690;3691;3705;3946;4050;4741;6467	774;775;776	414;476;571
AT5G56850	AT5G56850	unknown protein	62.04	10	2	20.7	4.4	153070000	1892300	248;452;1534;1743;1979;2285;2741;2806;3230;3232	True;True;True;True;True;True;True;True;True;True	248;453;1544;1754;1992;2299;2759;2825;3250;3252	358;657;2412;2789;3169;3617;4350;4478;5163;5167	382;697;2674;3080;3510;3985;4795;4938;5688;5692	382;697;2674;3080;3510;3985;4795;4938;5688;5692	261;262;263	76;365;534
AT1G24764	MAP70-2	Microtubule-associated proteins 70-2	70.206	24	11	34.4	18.2	152010000	14217000	277;325;436;455;518;709;725;731;939;960;1406;1692;1709;2192;2602;2660;2695;2732;2740;2872;2956;3306;3373;3500	False;True;False;False;False;True;False;True;False;False;True;False;False;True;False;True;False;True;True;True;True;True;False;False	277;325;437;456;519;713;729;735;945;966;1415;1703;1720;2206;2620;2678;2713;2750;2758;2891;2975;3326;3393;3520	405;406;479;633;660;661;755;1050;1071;1072;1081;1410;1437;2236;2688;2689;2740;3495;4153;4231;4286;4338;4349;4589;4727;5267;5387;5571	432;433;511;672;700;701;803;1122;1143;1144;1154;1519;1547;2491;2973;2974;3031;3860;4591;4674;4731;4783;4794;5058;5215;5804;5987;5988;6188	432;511;672;701;803;1122;1143;1154;1519;1547;2491;2973;3031;3860;4591;4674;4731;4783;4794;5058;5215;5804;5988;6188	172;173;592;593;594;595	154;229;304;341;357;559
AT3G19870	AT3G19870	unknown protein	122.28	16	3	19.4	4	144790000	2649400	427;934;949;1141;1382;1863;1891;1922;2029;2304;2309;2453;2704;2765;3181;3733	True;True;True;True;True;True;True;True;True;True;True;True;True;True;True;True	428;940;955;1148;1391;1874;1902;1933;2042;2319;2324;2470;2722;2783;3201;3758	622;1402;1403;1421;1800;2199;2994;3032;3074;3250;3645;3651;3884;4299;4386;5074;5931	661;1511;1512;1530;2023;2445;3302;3340;3385;3604;4016;4022;4291;4744;4831;5584;6582	661;1512;1530;2023;2445;3302;3340;3385;3604;4016;4022;4291;4744;4831;5584;6582	205;206;207;208;209;210;211;212	209;332;601;887;1045;1047;1056;1059
AT2G30520	RPT2	Root phototropism protein 2	65.854	10	3	19.2	7.4	138350000	3950100	43;352;365;1256;2399;2478;2780;2963;3690;3785	True;True;True;True;True;True;True;True;True;True	43;352;365;1264;2414;2496;2799;2982;3711;3810	67;513;530;1980;3783;3938;4423;4734;5840;6004	76;545;562;2213;4172;4349;4883;5222;6471;6661	76;545;562;2213;4172;4349;4883;5222;6471;6661	557;558;559	11;14;179
AT1G06070	BZIP69	Basic leucine zipper 69	47.13	3	5	10.4	21.3	137300000	28606000	544;2151;2394	True;True;True	545;2164;2409	793;3435;3776;3777	851;3798;4165;4166	851;3798;4165
AT3G15160	AT3G15160	unknown protein	62.438	7	3	15.3	7.5	131510000	8578600	280;535;1494;1937;2013;3038;3439	True;True;True;True;True;True;True	280;536;1503;1949;2026;3057;3459	409;776;2354;3110;3111;3222;4848;5485	436;824;2613;3445;3446;3575;5338;6093	436;824;2613;3446;3575;5338;6093
AT1G11310	MLO2	Mildew resistance locus O 2	65.543	5	5	8.7	12.2	128110000	21904000	1327;3043;3368;3369;3400	True;True;True;True;True	1336;3062;3388;3389;3420	2079;4854;5373;5374;5375;5436	2313;5344;5965;5966;5967;6042	2313;5344;5965;5967;6042	910;911	92;263
AT2G20790	AP5M	AP-5 complex subunit mu	66.704	8	1	17.8	2	120320000	2809600	155;1068;2103;2696;2893;3126;3458;3774	True;True;True;True;True;True;True;True	155;1074;2116;2714;2912;3146;3478;3799	241;1650;3353;4287;4637;4975;5509;5510;5993	261;1841;3716;4732;5117;5468;6117;6118;6649	261;1841;3716;4732;5117;5468;6117;6649	624;625	417;432
AT5G52580	AT5G52580	RAB GTPase activator activity	77.67	12	1	21.8	1.6	113010000	369400	479;509;656;1576;1955;2168;2210;2646;2909;2927;2982;3429	True;True;True;True;True;True;True;True;True;True;True;True	480;510;660;1587;1967;2182;2224;2664;2928;2946;3001;3449	690;743;744;970;2523;3137;3467;3521;4214;4664;4692;4774;5472;5473	730;791;792;1038;2798;3478;3831;3887;4656;5150;5179;5262;6080;6081	730;791;1038;2798;3478;3831;3887;4656;5150;5179;5262;6080	267;268	606;610
AT3G55360	ECR	Enoyl-CoA reductase, Eceriferum 10	35.723	7	9	28.4	31.6	109070000	37597000	235;468;511;840;977;1555;2198	True;True;True;True;True;True;True	235;469;512;844;983;1566;2212	343;678;747;1227;1463;1464;2456;3504	367;718;795;1307;1574;1575;2724;3869	367;718;795;1307;1574;2724;3869
AT2G37170, AT3G53420	PIP2B, PIP2A	Plasma membrane intrinsic protein 2B, plasma membrane ontrinsic protein 2A	30.474	2	1	8.7	3.5	105850000	766780	152;2820	True;True	152;2839	237;238;4504	257;258;4964	258;4964
AT1G10140	AT1G10140	unknown protein	18.373	5	6	37.7	41.9	96337000	20089000	1468;2392;3269;3291;3587	True;True;True;True;True	1477;2407;3289;3311;3607	2320;3774;5211;5247;5700	2575;4163;5737;5779;6325	2575;4163;5737;5779;6325	912	98
AT3G02420	AT3G02420	unknown protein	39.611	4	5	16.4	20.1	94851000	26981000	2551;3277;3325;3687	True;True;True;True	2569;3297;3345;3708	4058;4059;5224;5291;5837	4478;4479;5754;5831;6468	4478;5754;5831;6468	847	122
AT1G26480	AT1G26480	14-3-3-like protein GF14 iota	30.545	6	5	16	16	89294000	5829800	537;1579;1580;2295;2448;2449	False;True;True;False;False;False	538;1590;1591;2309;2310;2465;2466	779;780;781;782;783;784;2526;2527;2528;3629;3630;3631;3878;3879	827;828;829;830;831;832;833;834;835;836;837;838;839;840;841;2801;2802;2803;3998;3999;4000;4285;4286	830;2801;2803;4000;4285;4286	162;163;699	69;130;227
AT1G71710	AT1G71710	DNAse I-like superfamily protein	73.897	7	2	11.9	3.7	86223000	2171900	1307;1538;1991;2030;3213;3309;3775	True;True;True;True;True;True;True	1315;1548;2004;2043;3233;3329;3800	2054;2424;3183;3251;5137;5273;5994	2288;2691;3524;3605;5661;5813;6650	2288;2691;3524;3605;5661;5813;6650
AT3G06450	AT3G06450	HCO3- transporter family	80.767	7	5	11.6	12.4	85985000	11353000	896;1129;1670;1944;2885;3051;3499	True;True;True;True;True;True;True	902;1136;1681;1956;2904;3070;3519	1330;1781;2658;3124;4623;4624;4864;5570	1435;2004;2943;3464;5099;5100;5355;6187	1435;2004;2943;3464;5099;5355;6187	640	670
AT3G58620	TTL4	Tetratricopeptide-repeat thioredoxin-like 4	74.386	11	3	17.4	5.3	85190000	1637500	142;742;1171;1240;1241;1403;1872;1892;2536;3040;3398	True;True;True;True;True;True;True;True;True;True;True	142;746;1178;1248;1249;1412;1883;1903;2554;3059;3418	227;1095;1852;1960;1961;2233;3005;3033;4039;4850;5434	247;1168;2081;2193;2194;2488;3313;3341;4459;5340;6040	247;1168;2081;2193;2194;2488;3313;3341;4459;5340;6040
AT3G28180	CSLC4	Cellulose-synthase like C4	77.515	6	2	9.8	4	84785000	3646300	171;1176;1267;1986;1994;2899	True;True;True;True;True;True	171;1183;1275;1999;2007;2918	263;1859;1994;3178;3186;3187;4643	284;2088;2228;3519;3527;3528;5123	284;2088;2228;3519;3528;5123	796	612
AT5G50530, AT5G50640, AT5G63490	AT5G50530, AT5G50640, AT5G63490	CBS / octicosapeptide/Phox/Bemp1 (PB1) domains-containing protein	59.812	6	3	13.9	8.6	82592000	3965200	124;267;1372;1965;2213;3440	True;True;True;True;True;True	124;267;1381;1978;2227;3460	201;384;2185;3153;3524;5486	221;410;2431;3494;3891;6094	221;410;2431;3494;3891;6094	312	254
AT5G66930	ATG101	Autophagy-related 101	25.278	6	2	31.6	10.2	82063000	5981800	374;1476;2220;2317;2961;3198	True;True;True;True;True;True	375;1485;2234;2332;2980;3218	544;2334;3532;3661;4732;5111	576;2591;3899;4032;5220;5629	576;2591;3899;4032;5220;5629	257;258	1;135
AT2G30050	AT2G30050	Transducin family protein	32.642	6	1	33.4	3.6	81455000	638450	550;670;1440;1456;2257;3729	True;True;True;True;True;True	551;674;1449;1465;2271;3754	800;986;2285;2307;3581;5926	858;1054;2540;2562;3948;6577	858;1054;2540;2562;3948;6577	287	200
AT4G26130	AT4G26130	unknown protein	32.755	4	5	14	28.7	80562000	14804000	629;908;1351;3299	True;True;True;True	633;914;1360;3319	930;1354;2132;2133;5257	996;1460;2371;2372;5790	996;1460;2372;5790
AT3G55270	MKP1	Mitogen-activatated protein kinase phosphatase 1	85.963	9	3	15.7	6.6	78883000	2129800	128;674;1429;1498;1897;2096;2826;2835;3447	True;True;True;True;True;True;True;True;True	128;678;1438;1507;1908;2109;2845;2854;3467	205;992;2269;2359;2360;3040;3345;4511;4524;5493	225;1060;2524;2618;2619;3349;3706;4971;4984;6101	225;1060;2524;2619;3349;3706;4971;4984;6101	697	8
AT1G18740	AT1G18740	unknown protein	43.54	10	4	27.2	11.8	78423000	5345200	146;164;440;1324;1829;1987;2006;2535;2654;3387	True;True;True;True;True;True;True;True;True;True	146;164;441;1333;1840;2000;2019;2553;2672;3407	231;253;637;2076;2935;3179;3204;4038;4224;5420	251;273;676;2310;3234;3520;3552;4458;4666;6023	251;273;676;2310;3234;3520;3552;4458;4666;6023	849	285
AT5G20190	AT5G20190	Tetratricopeptide repeat-like superfamily proteins	31.819	2	2	9.3	9.3	75833000	1417900	1376;2784	True;True	1385;2803	2192;4430;4431	2438;4890;4891	2438;4891
AT4G10120	SPS4F	Sucrose-phosphate synthase 4F	118.88	13	21	13.3	19.6	71012000	26796000	87;380;555;1049;1394;1978;2427;2456;2529;2656;3546;3720;3816	True;True;True;False;True;True;True;True;True;True;True;True;False	87;381;557;1055;1403;1991;2444;2473;2547;2674;3566;3745;3841	150;550;810;1624;2224;3168;3831;3888;4029;4226;5633;5915;6041	170;582;868;1813;2479;3509;4224;4295;4449;4668;6254;6566;6698	170;582;868;1813;2479;3509;4224;4295;4449;4668;6254;6566;6698	224;225;226	202;211;707
AT1G79920, AT1G79930	HSP70-15, HSP91	Heat shock 70 kDa protein 15;Heat shock 70 kDa protein 14	91.679	3	14	5.7	20.9	63444000	22210000	262;917;1115	True;True;True	262;923;1122	379;1367;1763	404;1473;1985	404;1473;1985	114;115;116	57;58;540
AT4G32285	AT4G32285	ENTH/ANTH/VHS superfamily protein	70.554	9	6	17.5	10.1	62945000	3934700	186;692;941;1290;1912;2027;2043;2986;3329	True;True;True;True;True;True;True;True;True	186;696;947;1298;1923;2040;2056;3005;3349	282;1024;1412;2028;3060;3248;3269;4779;5296	305;1092;1521;2262;3370;3602;3624;5267;5836	305;1092;1521;2262;3370;3602;3624;5267;5836	603;621;622	90;201;384
AT1G06850	BZIP52	Basic leucine zipper 52	27.636	6	1	20	5.2	60400000	916690	543;2106;2152;2373;2374;3738	True;False;True;True;True;True	544;2119;2165;2388;2389;3763	792;3356;3436;3751;3752;5937	849;850;3719;3799;4140;4141;6588	850;3719;3799;4140;4141;6588	11	218
AT2G31800	AT2G31800	Integrin-linked protein kinase family	53.737	10	4	23.9	8.2	60367000	3235400	525;735;1036;1040;1315;1551;2746;3258;3343;3820	True;True;True;True;True;True;True;True;True;True	526;739;1042;1046;1324;1562;2764;3278;3363;3845	763;1086;1609;1613;2065;2452;4357;5198;5323;6048	811;1159;1797;1802;2299;2720;4802;5724;5870;6705	811;1159;1797;1802;2299;2720;4802;5724;5870;6705	513;514	154;175
AT2G21160	AT2G21160	Translocon-associated protein, alpha subunit	28.167	4	4	19	19	60351000	9819200	285;2222;3013;3452	True;True;True;True	285;2236;3032;3472	415;3534;4815;5500	442;3901;5303;6108	442;3901;5303;6108	435	101
AT3G22270	PAT1H1	Topoisomerase II-associated protein PAT1	85.645	5	5	7.9	7.7	60260000	4271000	141;348;1365;1775;3206	True;True;True;True;True	141;348;1374;1786;3226	226;507;2155;2838;5129	246;539;2394;3129;5653	246;539;2394;3129;5653	199	629
AT2G43160, AT3G59290	EPSIN2, EPSIN3	ENTH/VHS family protein	95.477	5	1	8.6	1.9	60042000	120850	200;360;2672;2969;2979	True;True;True;True;True	200;360;2690;2988;2998	298;521;4254;4741;4770	321;553;4697;5229;5258	321;553;4697;5229;5258	553;554;555	90;168;770
AT1G29310, AT2G34250	AT1G29310, AT2G34250	SecY protein transport family protein	52.068	2	6	4.2	12.4	58131000	15970000	93;1523	True;True	93;1533	157;2396	177;2656	177;2656
AT2G19460	AT2G19460	unknown protein	13.425	1	2	9.5	24.1	52993000	2220500	3275	TRUE	3295	5220;5221	5750;5751	5751
AT3G17900	AT3G17900	unknown protein	91.58	8	1	13.5	1.6	52605000	807800	474;771;1427;2757;2995;3127;3434;3672	True;True;True;True;True;True;True;True	475;775;1436;2775;3014;3147;3454;3693	685;1133;2267;4378;4789;4976;5480;5818	725;1209;2522;4823;5277;5469;6088;6447	725;1209;2522;4823;5277;5469;6088;6447	686;687;688	260;645;652
AT3G56950	SIP2	Small and basic intrinsic protein 2	28.518	5	5	21.2	22.7	52040000	15894000	1352;1593;1600;3111;3631	True;True;True;True;True	1361;1604;1611;3131;3652	2134;2543;2551;4951;5756;5757	2373;2818;2828;5444;6381;6382	2373;2818;2828;5444;6382	201	155
AT4G28520	CRU3	Cruciferin 3	58.235	6	7	15.3	21	46624000	27774000	63;192;1264;1460;2853;3226	True;True;True;True;True;True	63;192;1272;1469;2872;3246	99;100;288;1991;2311;4553;5159	109;110;311;2225;2566;5014;5684	109;311;2225;2566;5014;5684	676;677	392;464
AT2G38750	ANN4	Annexin 4	36.221	5	6	17.6	12.2	45403000	3369600	1547;1548;1966;2059;2819	True;True;True;True;True	1558;1559;1979;2072;2838	2445;2446;2447;3154;3289;4503	2713;2714;2715;3495;3644;4963	2713;2715;3495;3644;4963
AT3G53710	AGD6	ADP-ribosylation factor GTPase-activating protein 6	49.723	9	1	25.7	3.7	45017000	287440	890;1144;2166;2246;2472;3207;3591;3769;3808	True;False;True;False;True;False;True;False;True	896;1151;2180;2260;2490;3227;3611;3794;3833	1324;1805;3464;3568;3929;5130;5704;5988;6031	1429;2028;3828;3935;4338;4339;5654;6329;6644;6688	1429;2028;3828;3935;4339;5654;6329;6644;6688	302	213
AT1G09630, AT1G16920, AT3G15060, AT4G18800, AT5G45750, AT5G60860	RAB-A2a, RAB-A1b, RAB-A1g, RAB-A1d, RAB-A1c, RAB-A1f	Member of the RAB-A subfamily of small Rab GTPases	23.87	3	1	17.1	5.1	44926000	669970	144;1377;1688	True;True;True	144;1386;1699	229;2193;2683	249;2439;2968	249;2439;2968	747	183
AT2G43850	ILK1	Integrin-linked kinase 1	54.444	6	3	13.2	9	44121000	1862500	1316;1552;1632;1794;2268;3088	True;True;True;True;True;True	1325;1563;1643;1805;2282;3108	2066;2453;2605;2867;3594;4920	2300;2721;2887;3159;3961;5412	2300;2721;2887;3159;3961;5412	176;177;178	1;178;340
AT5G50860	AT5G50860	Protein kinase superfamily protein	64.287	6	1	11.4	1.9	43904000	318940	1232;1423;1513;2621;2721;3130	True;True;True;True;True;False	1240;1432;1522;2639;2739;3150	1948;2260;2379;4185;4324;4979	2179;2515;2638;4627;4769;5472	2179;2515;2638;4627;4769;5472
AT5G47390	MYBH	MYB hypocotyl elongation-related	39.67	5	2	14.5	6	42994000	436000	234;1252;1326;2274;3259	True;True;True;True;False	234;1260;1335;2288;3279	342;1976;2078;3603;5199;5200	366;2209;2312;3970;5725;5726	366;2209;2312;3970;5726	827;828	105;314
AT3G09900, AT3G46060, AT3G53610, AT5G03520	RAB-E1e, RAB-E1c/ARA3, RAB-E1a, RAB-E1d	Member of the RAB-E subfamily of small Rab GTPases	23.834	4	4	27.8	23.1	42160000	3146100	1025;1199;1638;2420	True;True;True;True	1031;1206;1649;2437	1594;1896;2613;2614;3822;3823	1782;2126;2897;2898;4215;4216	1782;2126;2897;4216	401	89
AT5G05170	CESA3	Cellulose synthase 3	119.68	3	1	3.4	1.2	40372000	2389000	1216;2269;2505	True;True;True	1224;2283;2523	1924;3595;3979	2154;2155;3962;4392	2155;3962;4392	647;648	1;12
AT1G34120	IP5PI	Inositol polyphosphate 5-phosphatase I	67.351	3	3	4.8	6.6	40269000	2778600	1538;1584;2912	False;True;True	1548;1595;2931	2424;2532;4667	2691;2807;5153	2691;2807;5153	563	277
AT3G03950	ECT1	Evolutionary conserved C-teminal region 1	47.944	8	4	24	11.1	37996000	10221000	547;1222;1357;1747;2576;3067;3217;3722	False;True;False;False;False;False;False;False	548;1230;1366;1758;2594;3086;3237;3747	796;1931;2139;2140;2141;2797;4114;4881;5142;5917	854;2162;2378;2379;2380;3088;4546;5372;5666;6568	854;2162;2379;3088;4546;5372;5666;6568	202	318
AT5G44120	CRA1	Cruciferina, 12S seed storage protein	52.594	4	11	12.7	30.1	28544000	27562000	1147;1455;1484;3224	True;True;True;True	1154;1464;1493;3244	1808;2306;2343;5156	2031;2561;2602;5681	2031;2561;2602;5681
AT4G25960	ABCB2	ATP-binding cassette B2	139.91	3	1	3.1	1.3	26739000	2088500	221;3303;3317	True;True;True	221;3323;3337	324;5261;5282	347;5794;5822	347;5794;5822	606	892
AT3G19820	DWF1	Dwarf 1	65.393	6	6	12.7	12.1	25889000	17282000	594;1041;1201;1202;1320;2275	True;True;True;True;True;True	598;1047;1208;1209;1329;2289	880;1614;1899;1900;2072;3604	944;1803;2129;2130;2306;3971	944;1803;2129;2130;2306;3971	520	509
AT2G47650	UXS4	UDP-xylolose synthase 4	49.945	4	6	10.6	14.4	24649000	6159800	1492;3640;3642;3647	True;True;True;True	1501;3661;3663;3668	2352;5768;5770;5779	2611;6393;6395;6404	2611;6393;6395;6404
AT2G42590	GRF9	14-3-3-like protein GF14 mu	29.463	5	6	20.2	24.6	23069000	8313700	537;2295;2448;2564;3709	False;False;False;True;True	538;2309;2310;2465;2582;3734	779;780;781;782;783;784;3629;3630;3631;3878;4093;5897	827;828;829;830;831;832;833;834;835;836;837;838;839;840;841;3998;3999;4000;4285;4525;6547	830;4000;4285;4525;6547	162;163;164;165	26;30;127;224
AT5G04840	AT5G04840	Basic leucine zipper protein	33.433	2	3	7.2	13.7	22858000	2404400	2843;3367	True;True	2862;3387	4536;5372	4997;5964	4997;5964
AT1G34320	PSI1	PSK simulator 1	72.84	2	2	3	2	22782000	1082100	1611;1733	True;True	1622;1744	2571;2774;2775	2852;3065;3066	2852;3066
AT4G29130	HXK1	Hexokinase 1	53.706	1	5	3.2	17.5	22614000	4143000	3249	TRUE	3269	5187	5713	5713	526;527	360;363
AT5G02430	AT5G02430	Transducin/WD40 repeat-like superfamily protein	99.893	2	2	3.2	3.2	22579000	574570	1776;3411	True;True	1787;3431	2839;5452	3130;6058	3130;6058
AT5G04040	SDP1	Sugar-dependent 1	92.091	2	1	3.4	2.1	21968000	224540	35;845	True;True	35;849	51;1232	60;1312	60;1312
AT2G31010	AT2G31010	Protein kinase superfamily protein	87.362	7	1	13.9	2.1	21358000	604810	579;1392;1430;1653;1740;2620;2692	True;True;True;True;True;True;True	583;1401;1439;1664;1751;2638;2710	849;2222;2270;2635;2786;4184;4283	909;2477;2525;2919;3077;4626;4728	909;2477;2525;2919;3077;4626;4728
AT3G51950	AT3G51950	Zinc finger family protein	59.788	2	1	4.1	3.7	19745000	806610	1268;1612	True;True	1276;1623	1995;2572	2229;2853	2229;2853
AT5G43900	MYA2	Myosin 2	176.52	1	1	0.6	0.6	19133000	1813000	1622	TRUE	1633	2594	2876	2876
AT3G15115	AT3G15115	unknown protein	38.765	1	1	5.3	5.3	18801000	1058200	596	TRUE	600	882	946	946
AT3G17780	AT3G17780	unknown protein	14.96	1	1	10.1	10.1	18544000	1794300	2004	TRUE	2017	3202	3550	3550
AT1G01610	GPAT4	Glycerol-3-phosphate SN-2-acyltransferase 4	56.261	6	5	14.3	11.3	15484000	7881000	651;971;2550;3243;3465;3507	True;True;True;True;True;True	655;977;2568;3263;3485;3527	965;1453;4057;5181;5520;5578	1033;1564;4477;5707;6128;6195	1033;1564;4477;5707;6128;6195
AT5G55610	AT5G55610	unknown protein	31.487	4	2	16.4	6.8	15256000	2085300	1148;1858;2554;3096	True;True;True;True	1155;1869;2572;3116	1809;2986;4062;4932	2032;3294;4482;5425	2032;3294;4482;5425
AT5G11970	AT5G11970	unknown protein	12.376	1	1	21.9	21.9	14321000	1376100	2653	TRUE	2671	4223	4665	4665	831	15
AT3G59770	SAC9	Suppressor of actin 9	181.92	4	2	3.9	2	14174000	905530	61;2032;2438;2958	True;True;True;True	61;2045;2455;2977	97;3253;3860;4729	107;3607;4256;5217	107;3607;4256;5217	204	412
AT2G01970, AT5G37310	AT2G01970, AT5G37310	Endomembrane protein 70 protein family	68.048	3	7	6.6	11.7	14120000	11060000	1355;3445;3688	True;True;True	1364;3465;3709	2137;5491;5838	2376;6099;6469	2376;6099;6469
AT1G14670	AT1G14670	Endomembrane protein 70 protein family	68.084	3	6	6.6	9.5	14120000	498820
AT4G21570	AT4G21570	unknown protein	33.993	1	2	4.4	7.8	13366000	1816800	1299	TRUE	1307	2042	2276	2276
AT4G21585	ENDO4	Endonuclease 4	34.203	1	1	5	5.7	13140000	564270	1428	TRUE	1437	2268	2523	2523
AT1G33230	AT1G33230	TMPIT-like protein	40.013	3	3	11.2	10.1	12418000	2297300	733;2273;3481	True;True;True	737;2287;3501	1084;3602;5545	1157;3969;6155	1157;3969;6155	646	99
AT1G50360	VIII-A	Myosin VIII A	130.01	14	4	14.5	3.9	12305000	149130	110;366;599;828;1433;1581;1630;1951;2848;2937;3140;3190;3236;3768	False;False;False;False;False;True;False;False;True;False;True;False;False;False	110;366;603;832;1442;1592;1641;1963;2867;2956;3160;3210;3256;3793	179;531;886;887;1213;2273;2274;2529;2603;3132;3133;4545;4703;4994;5096;5172;5986;5987	199;563;950;951;1291;2528;2529;2804;2885;3473;3474;5006;5190;5487;5607;5698;6642;6643	199;563;951;1291;2528;2804;2885;3474;5006;5190;5487;5607;5698;6643	143;144;145	124;185;262
AT1G70770	AT1G70770	unknown protein	66.864	2	3	3.3	6.2	12070000	1257300	1847;3596	True;True	1858;3616	2958;5710	3262;6335	3262;6335
AT3G62240	AT3G62240	RING/U-Box superfamily protein	90.223	1	3	1.4	1.6	11910000	1257300	2542	TRUE	2560	4046	4466	4466
AT5G62560	AT5G62560	RING/U-Box superfamily protein	60.464	3	1	8.9	2.9	11908000	669920	1072;1559;3766	True;True;True	1078;1570;3791	1654;2460;5984	1845;2728;6640	1845;2728;6640
AT2G14880	AT2G14880	SWIB/MDM2 domain superfamily protein	15.902	2	2	19.1	19.1	11654000	951110	347;682	True;True	347;686	506;1002	538;1070	538;1070
AT3G55000	TON1A	Tonneau 1A	29.334	2	1	9.6	5	10805000	272100	261;886	True;True	261;892	378;1320	403;1425	403;1425	772;773	146;150
AT1G48440	AT1G48440	B-cell receptor-associated 31-like	14.978	1	1	10.1	10.1	10697000	2249000	2149	TRUE	2162	3433	3796	3796
AT5G12440	AT5G12440	Zinc fingerfamily protein	71.959	2	1	2.9	2.5	10445000	2954000	1875;2643	True;True	1886;2661	3008;4211	3316;4653	3316;4653
AT4G27900	AT4G27900	CCT motif family protein	29.45	3	1	14.6	4.2	10441000	623360	1527;2772;3034	True;True;True	1537;2790;3053	2401;4394;4839	2661;4839;5329	2661;4839;5329	901	108
AT3G61070	PEX11E	Peroxin 11E	25.512	1	1	6.5	6.5	10367000	2432700	943	TRUE	949	1414	1523	1523
AT5G17190	AT5G17190	unknown protein	14.885	2	5	20	26.2	9998100	22524000	1154;3715	False;True	1161;3740	1816;5908	2039;6559	2039;6559
AT3G51460	RHD4	Root hair defective 4, Phosphoinositide phosphatase SAC6;Phosphoinositide phosphatase SAC7	67.625	1	3	1.7	6.2	9935800	5798600	3238	TRUE	3258	5175	5701	5701	561	407
AT4G04470	PMP22	22-kD peroxisomal membrane protein	21.719	2	2	9.5	14.7	9794700	6021800	3756;3813	True;True	3781;3838	5972;6037	6628;6694	6628;6694
AT5G04530	KCS19	3-Ketoacyl-CoA synthase 19	52.612	1	1	2.8	2.8	9785400	963790	103	TRUE	103	170	190	190
AT3G43220, AT5G20840	SAC3, SAC4	Suppressor of actin 3, Suppressor of actin 4	82.336	2	1	3.9	1.4	9056800	963790	36;3007	True;True	36;3026	52;4807	61;5295	61;5295
AT5G13000	CALS3	Callose synthase 3	221.53	1	4	0.7	2.5	8729000	3681100	1084	TRUE	1090	1679	1873	1873
AT3G47820	PUB39	Plant U-box 39	55.101	2	3	6.9	8.6	8571000	2668900	1076;3765	True;True	1082;3790	1665;5983	1859;6639	1859;6639
AT1G05570, AT2G31960	CALS1, GSL03	Callose synthase 1, Glucan synthse-like 3	221.02	1	4	0.6	2.8	8265000	2654800	3352	TRUE	3372	5336	5883	5883
AT5G11280	AT5G11280	unknown protein	22.854	1	2	4.8	11.5	8150700	2400200	606	TRUE	610	895	959	959
AT1G03880	CRU 2	Cruciferin 2	50.558	2	3	5.5	9	8109000	4598600	1484;3227	False;True	1493;3247	2343;5160	2602;5685	2602;5685
AT1G22710	SUT1	Sucrose transporter 1	54.546	1	2	3.1	5.5	7672300	3673900	835	TRUE	839	1221	1301	1301
AT4G35730	ISTL3	Regulator of Vps4 activity in the MVB pathway, IST1-LIKE 3	52.198	3	2	8.2	4.9	6965700	831600	16;444;662	True;True;True	16;445;666	24;645;977	24;684;1045	24;684;1045
AT5G14030	AT5G14030	Translocon-associated protein beta family protein	21.104	1	2	6.7	14.9	6888900	3659700	1262	TRUE	1270	1989	2223	2223
AT4G16990	RLM3	Resistance to Leptosphaeria maculans 3	91.153	2	1	3.3	2.1	6736300	403600	160;3653	True;True	160;3674	248;5787	268;6412	268;6412
AT4G13350	AT4G13350	Nuclear shuttle protein-interacting GTPase	65.026	2	1	3.5	1.8	6657300	953860	470;997	True;True	471;1003	680;1560	720;1748	720;1748
AT2G26110	AT2G26110	unknown protein	35.371	1	3	2.3	16.5	6507400	5355200	45	TRUE	45	69	78	78
AT1G50430	DWF5	Dwarf 5	49.404	1	2	3	6.5	6396500	20064000	1659	TRUE	1670	2642	2926;2927	2926
AT5G53420	AT5G53420	CCT motif family protein	20.984	1	1	8.6	5.9	6306200	1137100	2425	TRUE	2442	3828	4221	4221	6	70
AT4G10430	AT4G10430	TMPIT-like protein	39.895	1	2	2.9	6.1	6299200	1113500	2713	TRUE	2731	4311	4756	4756
AT3G57650	LPAT2	Lysophosphatidyl acyltransferase 2	43.676	2	4	5.7	12.6	6111400	4992700	681;1614	True;True	685;1625	1001;2574	1069;2855	1069;2855
AT1G70000	MYBD	MYB-like domain transcription factor	28.793	4	2	17.2	6	5684900	436000	1252;1929;2992;3259	False;True;True;False	1260;1941;3011;3279	1976;3101;4785;5199;5200	2209;3436;5273;5725;5726	2209;3436;5273;5726
AT4G33625	AT4G33625	unknown protein	22.484	1	2	8.5	10.1	5606600	3109300	3121	TRUE	3141	4964	5457	5457
AT4G39840	AT4G39840	unknown protein	50.609	1	3	3.5	6.4	5446500	3365400	2055	TRUE	2068	3284	3639	3639
AT1G45201	TLL1	Triacylglycerol lipase-like 1	44.118	2	5	7	16.5	5350200	10658000	1419;1644	True;True	1428;1655	2256;2623	2511;2907	2511;2907
AT5G41600	RTNLB4	Reticulan-like protein B4	28.948	1	1	4.3	4.3	5345900	870740	3703	TRUE	3726	5867	6502	6502
AT3G46430	AT3G46430	unknown protein	6.5846	1	1	20	20	5136000	2309500	2187	TRUE	2201	3490	3855	3855
AT4G03550	GSL05	Glucan synthase-like 5	206.91	2	2	1.4	1.3	5024300	544170	2031;2047	True;True	2044;2060	3252;3275	3606;3630	3606;3630
AT1G75760	AT1G75760	ER lumen protein retaining receptor family protein	30.695	1	2	3.7	8.1	4976300	2357200	2903	TRUE	2922	4651	5133	5133	564	259
AT1G61790	OST3/6	Oligosaccharyltransferase subunit 3/6	38.806	1	3	3.5	13	4975800	6215300	1845	TRUE	1856	2956	3260	3260	913	169
AT3G26520	TIP2	Tonoplast intrinsic protein 2	25.848	1	1	7.1	7.1	4878000	3272100	2418	TRUE	2435	3819	4212	4212
AT3G48750	CDC2	Cell division control 2	34.03	1	1	3.4	3.4	4743000	303950	1380	TRUE	1389	2197	2443	2443	382	91
AT4G24670	TAR2	Tryptophan aminotransferase related 2	50.006	2	8	4.5	23.4	4400800	11225000	542;3716	True;True	543;3741	791;5909	848;6560	848;6560
AT5G66680	DGL 1	Defective glycosylation	48.744	2	4	6.2	12.1	3824900	3513100	3437;3528	True;True	3457;3548	5483;5608	6091;6228	6091;6228
AT3G18000	NMT1	N-methyltransferase 1	56.102	2	4	5.7	10.8	3570200	6265700	34;3424	True;True	34;3444	50;5467	59;6075	59;6075
AT1G54010	GLL23	GDSL-like lipase 23	43.143	1	1	3.4	5.2	3163700	830340	2578	TRUE	2596	4116	4548	4548	626	226
AT3G14210	ESM1	Epithiospecifier modifier 1	44.06	1	1	5.1	5.1	3145900	693050	222	TRUE	222	325	348	348
AT1G06410	TPS7	Trehalose-phosphatase/synthase 7	96.687	1	4	1.3	5.1	2340300	2162000	341	TRUE	341	498	530	530
AT5G42980	TRX3	Thioredoxin 3	13.109	1	1	11.9	11.9	2126200	705150	3397	TRUE	3417	5433	6039	6039
AT2G44060	LEA26	Late embryogenesis abundant 26	36.036	1	1	3.4	6.8	1931300	271000	1596	TRUE	1607	2546	2823	2823
AT1G74730	AT1G74730	unknown protein	20.735	1	1	6.6	6.6	1788900	579090	75	TRUE	75	113	123	123
AT4G34290	AT4G34290	SWIB/MDM2 domain superfamily protein	15.998	2	2	19.4	19.4	1781400	739770	682;2555	False;True	686;2573	1002;4063	1070;4483	1070;4483	914	78
AT4G38680	CSP2	Cold shock protein 2	19.153	1	1	10.8	10.8	1566600	937090	1056	TRUE	1062	1635	1824	1824
AT3G21160	MNS2	Alpha-mannosidase 2	51.348	1	1	2.4	1.9	1544100	958230	2327	TRUE	2342	3672	4043	4043	584	394
AT2G25430	AT2G25430	ENTH/ANTH/VHS superfamily protein	72.083	5	6	6.9	10.1	1505700	3934700	186;1912;2027;2287;2986	False;False;False;True;False	186;1923;2040;2301;3005	282;3060;3248;3619;4779	305;3370;3602;3987;5267	305;3370;3602;3987;5267	603;604	90;282
AT1G24020	MLP423	MLP-like protein 423	17.054	1	2	10.3	16.1	1398400	1100700	3176	TRUE	3196	5066	5576	5576
AT4G12120	SEC1B	SEC1B, member of KEULE gene family	75.417	2	7	4.1	12.6	1352700	13405000	469;1497	True;False	470;1506	679;2358	719;2617	719;2617
AT1G68020, AT4G17770	TPS6, TPS5	Trehalose-phosphatase/synthase 6, Trehalose-phosphatase/synthase 5	80.068	1	4	1.6	5.1	858350	2162000	3637	TRUE	3658	5765	6390	6390

## Sheet: trafficking
Q9LQU7;F4HXV4	Q9LQU7;F4HXV4	Microtubule-associated protein 70-4	MAP70.4;MAP70-4	>sp|Q9LQU7|MP704_ARATH Microtubule-associated protein 70-4 OS=Arabidopsis thaliana GN=MAP70.4 PE=1 SV=1;>tr|F4HXV4|F4HXV4_ARATH Isoform of Q9LQU7, Microtubule-associated protein 70-4 OS=Arabidopsis thaliana GN=MAP70-4 PE=4 SV=1	2	0	18	67.487	430710000	0	430710000
F4IPB2;Q9ZUA3	F4IPB2;Q9ZUA3	Microtubule-associated protein 70-3	MAP70-3;MAP70.3	>tr|F4IPB2|F4IPB2_ARATH Isoform of Q9ZUA3, Microtubule-associated protein 70-3 OS=Arabidopsis thaliana GN=MAP70-3 PE=4 SV=1;>sp|Q9ZUA3|MP703_ARATH Microtubule-associated protein 70-3 OS=Arabidopsis thaliana GN=MAP70.3 PE=2 SV=1	2	0	16	69.859	136670000	0	136670000
A8MRI7;Q494P4	A8MRI7;Q494P4	BASIC PROLINE-RICH PROTEIN 1, BPP1, Mt-associated	At2g40070	>tr|A8MRI7|A8MRI7_ARATH Isoform of Q494P4, Uncharacterized protein OS=Arabidopsis thaliana GN=At2g40070 PE=1 SV=1;>tr|Q494P4|Q494P4_ARATH At2g40070 OS=Arabidopsis thaliana GN=At2g40070 PE=1 SV=1	2	0	4	59.418	125800000	0	125800000
O65570;O65570-2;Q9LVC6;O81645	O65570;O65570-2	Villin-4, actin bundling	VLN4	>sp|O65570|VILI4_ARATH Villin-4 OS=Arabidopsis thaliana GN=VLN4 PE=1 SV=1;>sp|O65570-2|VILI4_ARATH Isoform of O65570, Isoform 2 of Villin-4 OS=Arabidopsis thaliana GN=VLN4	4	0	8	109.33	77754000	0	77754000
Q67YI9;Q67YI9-2;Q93YP4	Q67YI9;Q67YI9-2	ENTH/VHS family protein, Clathrin interactor EPSIN 2	AT3G59290, At2g43160	>sp|Q67YI9|EPN2_ARATH Clathrin interactor EPSIN 2 OS=Arabidopsis thaliana GN=EPSIN2 PE=1 SV=1;>sp|Q67YI9-2|EPN2_ARATH Isoform of Q67YI9, Isoform 2 of Clathrin interactor EPSIN 2 OS=Arabidopsis thaliana GN=EPSIN2	3	0	5	95.477	60042000	0	60042000
Q9CAW4	Q9CAW4	Transport protein particle (TRAPP) component	AT3G05000, T9J14.5	>tr|Q9CAW4|Q9CAW4_ARATH Putative uncharacterized protein At3g05000 OS=Arabidopsis thaliana GN=T9J14.5 PE=2 SV=1	1	0	4	19.572	53968000	0	53968000
Q9FY61	Q9FY61	AtTRS120, s. AtTRS130, post Golgi transport	T5K6_30	>sp|Q9FY61|TR120_ARATH Trafficking protein particle complex II-specific subunit 120 homolog OS=Arabidopsis thaliana GN=TRS120 PE=1 SV=1	1	0	6	129.59	39952000	0	39952000
Q8RXT2	Q8RXT2	IST1-LIKE 7, ISTL7, Regulator of Vps4 activity in the MVB pathway	At4g32350	>tr|Q8RXT2|Q8RXT2_ARATH Putative uncharacterized protein At4g32350 OS=Arabidopsis thaliana GN=At4g32350 PE=1 SV=1	1	0	1	83.974	30697000	0	30697000
Q8L850	Q8L850	Phosphatidylinositol 4-phosphate 5-kinase 9	PIP5K9	>sp|Q8L850|PI5K9_ARATH Phosphatidylinositol 4-phosphate 5-kinase 9 OS=Arabidopsis thaliana GN=PIP5K9 PE=1 SV=2	1	0	4	92.091	27016000	0	27016000
Q9FFV2;F4K1U5	Q9FFV2;F4K1U5	Transport protein particle (TRAPP) component;	At5g54750	>tr|Q9FFV2|Q9FFV2_ARATH Isoform of F4K1U5, AT5g54750/MBG8_1 OS=Arabidopsis thaliana GN=At5g54750 PE=2 SV=1;>tr|F4K1U5|F4K1U5_ARATH Transport protein particle (TRAPP) component OS=Arabidopsis thaliana GN=At5g54750 PE=4 SV=1	2	0	3	20.759	13617000	0	13617000
F4JY37	F4JY37	microtubule-associated kinase-like protein RUNKEL	RUK	>sp|F4JY37|RUK_ARATH Serine/threonine-protein kinase RUNKEL OS=Arabidopsis thaliana GN=RUK PE=1 SV=1	1	0	1	152.28	10933000	0	10933000
Q9SKS7	Q9SKS7	SNARE-like superfamily protein	At2g20930	>tr|Q9SKS7|Q9SKS7_ARATH AT2G20930 protein OS=Arabidopsis thaliana GN=At2g20930 PE=2 SV=2	1	0	2	15.679	6965600	0	6965600
Q9FQ24	Q9FQ24	Protein TONNEAU 1b, involved in cortical microtubule organization	TON1B	>sp|Q9FQ24|TON1B_ARATH Protein TONNEAU 1b OS=Arabidopsis thaliana GN=TON1B PE=1 SV=1	1	0	1	29.185	6804700	0	6804700
Q9SYB8	Q9SYB8	SNARE-like superfamily protein	F11M15.2	>tr|Q9SYB8|Q9SYB8_ARATH At1g51160 OS=Arabidopsis thaliana GN=F11M15.2 PE=2 SV=1	1	0	1	18.965	6570700	0	6570700
F4HTY0	F4HTY0	SNARE-like superfamily protein	At1g80500	>tr|F4HTY0|F4HTY0_ARATH SNARE-like protein OS=Arabidopsis thaliana GN=At1g80500 PE=4 SV=1	1	0	1	15.264	3851200	0	3851200
in beiden
Q9FJF1;P28186;Q9LZD4-2;Q9LZD4;Q9SF91;O24466	Q9FJF1;P28186;Q9LZD4-2;Q9LZD4;Q9SF91	Ras-related protein RABE1c;Ras-related protein RABE1d;Ras-related protein RABE1e	At5g59840;RABE1C;RABE1D;RABE1E	>tr|Q9FJF1|Q9FJF1_ARATH Putative GTP-binding protein ara-3 OS=Arabidopsis thaliana GN=At5g59840 PE=2 SV=1;>sp|P28186|RAE1C_ARATH Ras-related protein RABE1c OS=Arabidopsis thaliana GN=RABE1C PE=1 SV=1;>sp|Q9LZD4-2|RAE1D_ARATH Isoform of Q9LZD4, Isoform 2 of	6	2	4	23.834	59730000	17570000	42160000
F4HXP0;Q8RXE7-2;Q8RXE7;Q8RXE7-3	F4HXP0;Q8RXE7-2;Q8RXE7;Q8RXE7-3	Probable ADP-ribosylation factor GTPase-activating protein AGD14	ZIGA4;AGD14	>tr|F4HXP0|F4HXP0_ARATH Isoform of Q8RXE7, Putative ADP-ribosylation factor GTPase-activating protein AGD14 OS=Arabidopsis thaliana GN=ZIGA4 PE=1 SV=1;>sp|Q8RXE7-2|AGD14_ARATH Isoform of Q8RXE7, Isoform 2 of Probable ADP-ribosylation factor GTPase-activati	4	0	14	71.559	1031800000	0	1031800000
O80925	O80925	ADP-ribosylation factor GTPase-activating protein AGD7	AGD7	>sp|O80925|AGD7_ARATH ADP-ribosylation factor GTPase-activating protein AGD7 OS=Arabidopsis thaliana GN=AGD7 PE=1 SV=1	1	0	12	49.251	185050000	0	185050000
Q9FK68;Q9SN35;Q9LNW1;Q39222;P28185;Q9LK99;Q9FJH0;Q9FIF9;Q96283;O49513;O04486;Q9S810;Q1PEX3	Q9FK68;Q9SN35	Ras-related protein RABA1c;Ras-related protein RABA1d	RABA1C;RABA1D	>sp|Q9FK68|RAA1C_ARATH Ras-related protein RABA1c OS=Arabidopsis thaliana GN=RABA1C PE=2 SV=1;>sp|Q9SN35|RAA1D_ARATH Ras-related protein RABA1d OS=Arabidopsis thaliana GN=RABA1D PE=2 SV=1	13	0	3	23.87	44926000	0	44926000
F4KG92;F4KG91	F4KG92;F4KG91	RAB GTPase activator activity	At5g52580	>tr|F4KG92|F4KG92_ARATH Isoform of F4KG91, RabGAP/TBC domain-containing protein OS=Arabidopsis thaliana GN=At5g52580 PE=1 SV=1;>tr|F4KG91|F4KG91_ARATH RabGAP/TBC domain-containing protein OS=Arabidopsis thaliana GN=At5g52580 PE=1 SV=1	2	0	12	77.67	113010000	0	113010000
Q9M354	Q9M354	Probable ADP-ribosylation factor GTPase-activating protein AGD6	AGD6	>sp|Q9M354|AGD6_ARATH Probable ADP-ribosylation factor GTPase-activating protein AGD6 OS=Arabidopsis thaliana GN=AGD6 PE=1 SV=1	1	0	9	49.723	45017000	0	45017000
Q8GUJ5;F4IA60	Q8GUJ5	Outer arm dynein light chain 1 protein	At4g03260	>tr|Q8GUJ5|Q8GUJ5_ARATH At4g03260 OS=Arabidopsis thaliana GN=At4g03260 PE=2 SV=1	2	0	10	74.692	212250000	0	212250000
Q9C5X3	Q9C5X3	SNARE-interacting protein KEULE	KEU, AT1G12360	>sp|Q9C5X3|KEULE_ARATH SNARE-interacting protein KEULE OS=Arabidopsis thaliana GN=KEU PE=1 SV=2	1	0	12	75.082	176280000	0	176280000
Q9SZ77	Q9SZ77	ATSEC1B, SEC1B, member of KEULE Gene Family	SEC1B, AT4G12120	>sp|Q9SZ77|SEC1B_ARATH Protein transport Sec1b OS=Arabidopsis thaliana GN=SEC1B PE=2 SV=3	1	0	2	75.417	1352700	0	1352700
F4K0C4	F4K0C4	CLUB, TRAPPII,post-Golgi trafficking, required for cell polarity, AtTRS130, upstream RAB_A	CLUB	>sp|F4K0C4|TR130_ARATH Trafficking protein particle complex II-specific subunit 130 homolog OS=Arabidopsis thaliana GN=TRS130 PE=1 SV=1	1	0	13	140.68	571590000	0	571590000
F4IJE1	F4IJE1	Phox-associated domain;Phox-like;Sorting nexin, C-termina	At2g15900	>tr|F4IJE1|F4IJE1_ARATH Phox domain-containing protein OS=Arabidopsis thaliana GN=At2g15900 PE=1 SV=1	1	0	15	113.72	243380000	0	243380000
F4JNS8	F4JNS8	IST1-LIKE 3, ISTL3, Regulator of Vps4 activity in the MVB pathway	At4g35730	>tr|F4JNS8|F4JNS8_ARATH Regulator of Vps4 activity in the MVB pathway protein OS=Arabidopsis thaliana GN=At4g35730 PE=4 SV=1	1	0	3	52.198	6965700	0	6965700
Q8LF20	Q8LF20	Putative clathrin assembly protein , epsin N-terminal homology (ENTH) domain-containing protein / clathrin assembly protein-related;	At2g25430	>sp|Q8LF20|CAP2_ARATH Putative clathrin assembly protein At2g25430 OS=Arabidopsis thaliana GN=At2g25430 PE=1 SV=2	1	0	5	72.083	1505700	0	1505700
Q8S9J8	Q8S9J8	ENTH/ANTH/VHS protein superfamily (VPS-like, trafficking passing through endosomes) CAP1, ECA4: part of TPLATE Complex	At4g32285	>sp|Q8S9J8|CAP1_ARATH Probable clathrin assembly protein At4g32285 OS=Arabidopsis thaliana GN=At4g32285 PE=1 SV=2	1	0	9	70.554	62945000	0	62945000
Q8W0Z6;F4IFJ0;Q8W0Z6-2	Q8W0Z6;F4IFJ0;Q8W0Z6-2	AP-5 complex subunit mu	AP5M;At2g20790	>sp|Q8W0Z6|AP5M_ARATH AP-5 complex subunit mu OS=Arabidopsis thaliana GN=AP5M PE=2 SV=1;>tr|F4IFJ0|F4IFJ0_ARATH Isoform of Q8W0Z6, Clathrin adaptor complexes medium subunit family protein OS=Arabidopsis thaliana GN=At2g20790 PE=4 SV=1;>sp|Q8W0Z6-2|AP5M_ARA	3	0	8	66.704	120320000	0	120320000
Q9SA78;B3H5Z4;O64748	Q9SA78	Coatomer subunit epsilon-1		>sp|Q9SA78|COPE1_ARATH Coatomer subunit epsilon-1 OS=Arabidopsis thaliana GN=At1g30630 PE=2 SV=1	3	3	9	32.602	66103000	6257900	59845000
Q9FGK9	Q9FGK9	MAIGO 5	At5g47480	>sp|Q9FGK9|MAG5_ARATH Protein transport protein SEC16A homolog OS=Arabidopsis thaliana GN=MAG5 PE=1 SV=1	1	0	30	145.88	735720000	0	735720000
Q9FGK8	Q9FGK8	MAIGO-related?	At5g47490	>sp|Q9FGK8|SC16B_ARATH Protein transport protein SEC16B homolog OS=Arabidopsis thaliana GN=SEC16B PE=1 SV=1	1	0	18	147.81	558190000	0	558190000
Q9C9X0	Q9C9X0	Microtubule-associated protein 70-1	MAP70.1	>sp|Q9C9X0|MP701_ARATH Microtubule-associated protein 70-1 OS=Arabidopsis thaliana GN=MAP70.1 PE=1 SV=1	1	0	28	69.289	2936000000	0	2936000000
Q8L7S4	Q8L7S4	Microtubule-associated protein 70-2	MAP70.2	>sp|Q8L7S4|MP702_ARATH Microtubule-associated protein 70-2 OS=Arabidopsis thaliana GN=MAP70.2 PE=1 SV=1	1	0	24	70.206	152010000	0	152010000
Q9T041	Q9T041	Microtubule-associated protein TORTIFOLIA1	TOR1	>sp|Q9T041|MAPT_ARATH Microtubule-associated protein TORTIFOLIA1 OS=Arabidopsis thaliana GN=TOR1 PE=1 SV=2	1	0	12	94.003	217470000	0	217470000
Q9LHE9;F4JCF9;F4I9H4;F4K0A7;F4K0A6	Q9LHE9;F4JCF9	Myosin-1	VIII-1;ATM1	>sp|Q9LHE9|MYO1_ARATH Myosin-1 OS=Arabidopsis thaliana GN=VIII-1 PE=1 SV=1;>tr|F4JCF9|F4JCF9_ARATH Isoform of Q9LHE9, Myosin 1 OS=Arabidopsis thaliana GN=ATM1 PE=1 SV=1	5	0	35	131.13	1019000000	0	1019000000
F4K7C4;F4K7C5;Q9LKB9	F4K7C4;F4K7C5;Q9LKB9	Myosin-6	MYA2;XI-2	>tr|F4K7C4|F4K7C4_ARATH Isoform of Q9LKB9, Myosin 2 OS=Arabidopsis thaliana GN=MYA2 PE=4 SV=1;>tr|F4K7C5|F4K7C5_ARATH Isoform of Q9LKB9, Myosin 2 OS=Arabidopsis thaliana GN=MYA2 PE=4 SV=1;>sp|Q9LKB9|MYO6_ARATH Myosin-6 OS=Arabidopsis thaliana GN=XI-2 PE=1	3	0	1	176.52	19133000	0	19133000
Q9SGW5	Q9SGW5	light stimulated actin bundling	At1g64500	>tr|Q9SGW5|Q9SGW5_ARATH F1N19.7 OS=Arabidopsis thaliana GN=At1g64500 PE=1 SV=1	1	0	7	41.016	283110000	0	283110000
Q7X911;Q9C5G5	Q7X911;Q9C5G5	Phosphoinositide phosphatase SAC6;Phosphoinositide phosphatase SAC7	SAC6;SAC7	>sp|Q7X911|SAC6_ARATH Phosphoinositide phosphatase SAC6 OS=Arabidopsis thaliana GN=SAC6 PE=2 SV=1;>sp|Q9C5G5|SAC7_ARATH Phosphoinositide phosphatase SAC7 OS=Arabidopsis thaliana GN=SAC7 PE=2 SV=1	2	0	1	67.625	9935800	0	9935800
F4J9G0;Q7XZU0;F4J9G1	F4J9G0;Q7XZU0;F4J9G1	Probable phosphoinositide phosphatase SAC9	SAC9	>tr|F4J9G0|F4J9G0_ARATH Isoform of Q7XZU0, Phosphoinositide phosphatase SAC9 OS=Arabidopsis thaliana GN=SAC9 PE=1 SV=1;>sp|Q7XZU0|SAC9_ARATH Probable phosphoinositide phosphatase SAC9 OS=Arabidopsis thaliana GN=SAC9 PE=1 SV=1;>tr|F4J9G1|F4J9G1_ARATH Isofor	3	0	4	181.92	14174000	0	14174000
F4IXV2;Q7XZU2;Q7XZU1	F4IXV2;Q7XZU2;Q7XZU1	Phosphoinositide phosphatase SAC3;Phosphoinositide phosphatase SAC4	At3g43220;SAC3;SAC4	>tr|F4IXV2|F4IXV2_ARATH Isoform of Q7XZU2, Phosphoinositide phosphatase family protein OS=Arabidopsis thaliana GN=At3g43220 PE=4 SV=1;>sp|Q7XZU2|SAC3_ARATH Phosphoinositide phosphatase SAC3 OS=Arabidopsis thaliana GN=SAC3 PE=2 SV=1;>sp|Q7XZU1|SAC4_ARATH Ph	3	0	2	82.336	9056800	0	9056800
Q9FUR2-2;Q9FUR2	Q9FUR2-2;Q9FUR2	Type I inositol 1,4,5-trisphosphate 5-phosphatase 2	IP5P2	>sp|Q9FUR2-2|IP5P2_ARATH Isoform of Q9FUR2, Isoform 2 of Type I inositol polyphosphate 5-phosphatase 2 OS=Arabidopsis thaliana GN=IP5P2;>sp|Q9FUR2|IP5P2_ARATH Type I inositol polyphosphate 5-phosphatase 2 OS=Arabidopsis thaliana GN=IP5P2 PE=1 SV=2	2	0	11	70.08	154870000	0	154870000
Q84MA2-2;Q84MA2;F4HT46	Q84MA2-2;Q84MA2;F4HT46	Type I inositol 1,4,5-trisphosphate 5-phosphatase 1	IP5P1;IP5PI	>sp|Q84MA2-2|IP5P1_ARATH Isoform of Q84MA2, Isoform 2 of Type I inositol polyphosphate 5-phosphatase 1 OS=Arabidopsis thaliana GN=IP5P1;>sp|Q84MA2|IP5P1_ARATH Type I inositol polyphosphate 5-phosphatase 1 OS=Arabidopsis thaliana GN=IP5P1 PE=1 SV=2;>tr|F4HT	3	0	3	67.351	40269000	0	40269000
F4IA20;Q8H0Z6	F4IA20;Q8H0Z6	inositol-polyphosphate 5-phosphatase activity,	At1g71710	>tr|F4IA20|F4IA20_ARATH Isoform of Q8H0Z6, DNAse I-like superfamily protein OS=Arabidopsis thaliana GN=At1g71710 PE=1 SV=1;>sp|Q8H0Z6|IP5P3_ARATH Type IV inositol polyphosphate 5-phosphatase 3 OS=Arabidopsis thaliana GN=IP5P3 PE=1 SV=1	2	0	7	73.897	86223000	0	86223000
Q9ZPS7;Q940S0;Q9FHT4	Q9ZPS7;Q940S0	Endomembrane protein 70 protein family	At2g01970;At1g14670, At5g37310	>sp|Q9ZPS7|TMN3_ARATH Transmembrane 9 superfamily member 3 OS=Arabidopsis thaliana GN=TMN3 PE=2 SV=1;>sp|Q940S0|TMN2_ARATH Transmembrane 9 superfamily member 2 OS=Arabidopsis thaliana GN=TMN2 PE=2 SV=1	3	0	3	68.048	14120000	0	14120000	1355;3445;3688	True;True;True	1364;3465;3709	2137;5491;5838	2376;6099;6469	2376;6099;6469
F4I507	F4I507	Myosin-3	VIII-A	>sp|F4I507|MYO3_ARATH Myosin-3 OS=Arabidopsis thaliana GN=VIII-A PE=2 SV=1	1	0	14	130.01	12305000	0	12305000
Q9ZVJ6	Q9ZVJ6	Annexin D4	ANN4	>sp|Q9ZVJ6|ANXD4_ARATH Annexin D4 OS=Arabidopsis thaliana GN=ANN4 PE=2 SV=1	1	0	5	36.221	45403000	0	45403000
Q9FQ25	Q9FQ25	Protein TONNEAU 1a, involved in cortical microtubule organization	TON1A	>sp|Q9FQ25|TON1A_ARATH Protein TONNEAU 1a OS=Arabidopsis thaliana GN=TON1A PE=1 SV=1	1	0	2	29.334	10805000	0	10805000
Q8VYP7;O80489;Q01474;O04834	Q8VYP7;O80489;Q01474;O04834	GTP-binding protein SAR1B;GTP-binding protein SAR1A, SAR1C, ARF-like	At3g62560;T12M4.12;SAR1B;SAR1A	>tr|Q8VYP7|Q8VYP7_ARATH Putative Sar1 GTP binding protein OS=Arabidopsis thaliana GN=At3g62560 PE=2 SV=1;>tr|O80489|O80489_ARATH Putative GTP-binding protein, SAR1B OS=Arabidopsis thaliana GN=T12M4.12 PE=2 SV=1;>sp|Q01474|SAR1B_ARATH GTP-binding protein SA	4	0	2	21.939	10045000	0	10045000
Q8VYP7;Q01474;O04834 1. Versuch	Q8VYP7;Q01474;O04834	GTP-binding protein SAR1B;GTP-binding protein SAR1A	At3g62560;SAR1B;SAR1A	>tr|Q8VYP7|Q8VYP7_ARATH Putative Sar1 GTP binding protein OS=Arabidopsis thaliana GN=At3g62560 PE=2 SV=1;>sp|Q01474|SAR1B_ARATH GTP-binding protein SAR1B OS=Arabidopsis thaliana GN=SAR1B PE=1 SV=1;>sp|O04834|SAR1A_ARATH GTP-binding protein SAR1A OS=Arabido	3	1	1	21.939	589160	170810	418350	2	168	2447	TRUE	2475	3747;3748	4303;4304	4304
		eps: 1E+11
